# Dose response of running on blood biomarkers of wellness in the generally healthy

1 **Bartek Nogal<sup>1†</sup>, Svetlana Vinogradova<sup>1†</sup>, Milena Jorge<sup>1</sup>, Ali Torkamani<sup>2,3</sup>, Paul Fabian<sup>1</sup>, and**  
2 **Gil Blander<sup>1\*</sup>**

3 <sup>1</sup>InsideTracker, Cambridge, Massachusetts, United States of America.

4 <sup>2</sup>The Scripps Translational Science Institute, The Scripps Research Institute, La Jolla, CA, USA.

5 <sup>3</sup>Department of Integrative Structural and Computational Biology, The Scripps Research Institute, La  
6 Jolla, CA, USA.

7 <sup>†</sup>**Equal Contribution:** These authors contributed equally

8 **\* Correspondence:**

9 Gil Blander

10 [gblander@insdietracker.com](mailto:gblander@insdietracker.com)

## 11 **Abstract**

12 Exercise is effective toward delaying or preventing chronic disease, with a large body of evidence  
13 supporting its effectiveness. However, less is known about the specific healthspan-promoting effects  
14 of exercise on blood biomarkers in the disease-free population. In this work, we examine 23,237  
15 generally healthy individuals who self-report varying weekly running volumes and compare them to  
16 4,428 generally healthy sedentary individuals, as well as 82 professional endurance athletes. We  
17 estimate the significance of differences among blood biomarkers for groups of increasing running  
18 levels using analysis of variance (ANOVA), adjusting for age, gender, and BMI. We attempt and add  
19 insight to our observational dataset analysis via two-sample Mendelian randomization (2S-MR) using  
20 large independent datasets. We find that self-reported running volume associates with biomarker  
21 signatures of improved wellness, with some serum markers apparently being principally modified by  
22 BMI, whereas others show a dose-effect with respect to running volume. We further detect hints of  
23 sexually dimorphic serum responses in oxygen transport and hormonal traits, and we also observe a  
24 tendency toward pronounced modifications in magnesium status in professional endurance athletes.  
25 Thus, our results further characterize blood biomarkers of exercise and metabolic health, particularly  
26 regarding dose-effect relationships, and better inform personalized advice for training and  
27 performance.

## 28 **1 Introduction**

29 Physical inactivity is one of the leading modifiable behavioral causes of death in the US (1).  
30 Worldwide, physical inactivity is estimated to account for about 8.3% of premature mortality, an effect  
31 size that is on the same order as smoking and obesity (2). At the same time, the potent health benefits  
32 of exercise have been proven time and time again, with results so consistent across a wide variety of  
33 chronic diseases that some posit it can be considered a medical intervention (3, 4, 5). However, since  
34 most investigators understandably report the effects of exercise in either diseased populations or  
35 athletes (6, 7), there exists a gap in knowledge as to the measurable effects of exercise in the generally

36 healthy population who exercise for the purpose of improving their healthspan, which can, in part, be  
37 projected via established measures such as blood biomarkers (8, 9, 10, 11).

38 It is well established that routine laboratory biomarkers are validated proxies of the state of an  
39 individual's overall metabolic health and other healthspan-related parameters (12). A large body of  
40 evidence supports the effectiveness of exercise in modifying blood biomarkers toward disease  
41 mitigation in diseased cohorts as well as athletes, where the effect sizes may be larger (6, 13). Indeed,  
42 it's been shown that more favorable changes in response to exercise training occur usually in those  
43 with more pronounced dyslipidemia (13). In professional athletes, the sheer volume and/or intensity  
44 of physical activity may drive large effects in various hematological, lipid, immune, and endocrine  
45 variables (6). Toward helping to fill the gap in understanding of the effects of exercise on blood  
46 biomarkers of the generally healthy, we endeavored to explore the effects of vigorous exercise such as  
47 running in apparently healthy, non-athletic cohort to better understand the landscape of blood  
48 biomarker modifications expected in the individual who partakes in mostly recreational physical  
49 activity for the purpose of maintaining good health.

50 For this purpose, we leveraged the InsideTracker dataset that includes information on self-reported  
51 exercise habits combined with blood biomarker and genomics data. We have previously reported on  
52 the results of a longitudinal analysis on blood biomarker data from 1032 generally healthy individuals  
53 who used our automated, web-based personalized nutrition and lifestyle platform (14). For the purpose  
54 of this investigation, we focused on running as the exercise of choice as it is one of the most common  
55 (purposeful) physical activity modalities practiced globally by generally healthy individuals and would  
56 thus be relevant. Moreover, since this was a cross-sectional study, we attempted to increase our  
57 capacity to begin to infer causality as well as tease out potential confounders by performing 2S-MR in  
58 large independent cohorts.

## 59 **2 Materials and methods**

### 60 **2.1 Dataset**

61 We conducted an observational analysis of data from InsideTracker users. InsideTracker is a direct-  
62 to-consumer (DTC) company established in 2009 that markets and sells InsideTracker  
63 ([insidetracker.com](https://insidetracker.com)), a personalized lifestyle recommendation platform. The platform provides serum  
64 biomarker and genomics testing, and performs integrative analysis of these datasets, combined with  
65 activity/sleep tracker data toward biomarker and healthspan optimization (of note, at the time of this  
66 analysis, we did not have sufficient users with activity/sleep tracker data to include this data stream in  
67 the current study). New users were continuously added to the InsideTracker database from January  
68 2011 to March 2022.

69

### 70 **2.2 Recruitment of participants**

71 Recruitment of participants aged between 18 and 65 and residing in North America was conducted  
72 through company marketing and outreach. Participants were subscribing members to the InsideTracker  
73 platform and provided informed consent to have their blood test data and self-reported information  
74 used in an anonymized fashion for research purposes. Research was conducted according to guidelines  
75 for observational research in tissue samples from human subjects. Eligible participants completed a  
76 questionnaire that included age, ethnicity, sex, dietary preferences, physical activity, and exposure to  
77 sunlight. This study employed data from 23,237 participants that met our analysis inclusion

78 requirements, namely absence of any chronic disease as determined by questionnaire and metabolic  
79 blood biomarkers within normal clinical reference ranges. The platform is not a medical service and  
80 does not diagnose or treat medical conditions, so medical history and medication use were not  
81 collected. The Institutional Review Board (IRB) determine this work was not subject to a review based  
82 on category 4 exemption (“secondary research” with de-identified subjects).

### 83 **2.3 Biomarker collection and analysis**

84 Blood samples were collected and analyzed by Clinical Laboratory Improvement Amendments  
85 (CLIA)-approved, third-party clinical labs (primarily Quest Diagnostics and LabCorp). Participants  
86 were instructed to fast for 12 hours prior to the phlebotomy, with the exception of water consumption.  
87 Results from the blood analysis were then uploaded to the platform via electronic integration with the  
88 CLIA-approved lab. Participants chose a specific blood panel from 7 possible offerings, each  
89 comprising some subset of the biomarkers available. Due to the variation in blood panels offered, the  
90 participant sample size per biomarker is not uniform.

### 91 **2.3 Biomarker dataset preparation**

92 In our raw dataset, occasional outlier values were observed that were deemed implausible (e.g. fasting  
93 glucose < 65 mg/dL). To remove anomalous outliers in a systematic way, we used the Interquartile  
94 Range (IQR) method of identifying outliers, removing data points which fell below  $Q1 - 1.5 \text{ IQR}$  or  
95 above  $Q3 + 1.5 \text{ IQR}$ .

### 96 **2.4 Calculation of polygenic scores**

97 The variants (SNPs) comprising the polygenic risk scores were derived from publicly available GWAS  
98 summary statistics (<https://www.ebi.ac.uk/gwas/>). Scores were calculated across users by summing  
99 the product of effect allele doses weighted by the beta coefficient for each SNP, as reported in the  
100 GWAS summary statistics. Variant p-value thresholds were generally chosen based on optimization  
101 of respective PGS-blood biomarker correlation in the entire InsideTracker cohort with both blood and  
102 genomics datasets (~1000-1500 depending on the blood biomarker at the time of analysis). Genotyping  
103 data was derived from a combination of a custom InsideTracker array and third party arrays such as  
104 23andMe and Ancestry. Not all variants for any particular PGS were genotyped on every array; proxies  
105 for missing SNPs were extracted via the “LDlinkR” package using the Utah Residents (CEPH) with  
106 Northern and Western European ancestry (CEU) population ( $R^2 > 0.8$  cut-off). Only results PGSs for  
107 which there was sufficient biomarker-genotyping dataset overlap were reported (note that none of the  
108 blood biomarker PGSs met this requirement).

### 109 **2.5 Blood biomarker analysis with respect to running volume and polygenic scores**

110 To estimate significance of differences for blood biomarkers levels among exercise groups, we  
111 performed 3-way analysis of variance (ANOVA) analysis adjusting for age, gender, and BMI (type-II  
112 analysis-of-variance tables function ANOVA from ‘car’ R package, version 3.0-12). When estimating  
113 the effort of reported training volume on biomarkers, we assigned numerical values corresponding to  
114 4 levels of running and performed ANOVA analysis with those levels treating it as an independent  
115 variable. P-values were adjusted using the Benjamini & Hochberg method (15). P-values for  
116 interaction plots were calculated with ANOVA including interaction between exercise group and  
117 polygenic scores category. When comparing runners (PRO and HVAM combined) versus sedentary  
118 individuals, we used propensity score matching method to account for existing covariates (age and  
119 gender): we identified 745 sedentary individuals with similar to runners’ age distributions among both

120 males and females. We used ‘MatchIt’ R package (version 4.3.3) implementing nearest neighbor  
121 method for matching (16).

## 122 **2.6 Mendelian randomization**

123 We attempted to add insight around the causality of exercise vs. BMI differences with respect to serum  
124 marker improvement by performing MR analyses on a subset of biomarker observations where BMI  
125 featured as a strong covariate and was thus used as the IV in the 2S-MR. Thus, our hypothesis here  
126 was that BMI differences were the primary (causal) driver behind the improvement behind some  
127 biomarkers. MR uses genetic variants as modifiable exposure (risk factor) proxies to evaluate causal  
128 relationships in observational data while reducing the effects of confounders and reverse causation  
129 (Figure 1S). These SNPs are used as instrumental variables and must meet 3 basic assumptions: (1)  
130 they must be robustly associated with the exposure; (2) they must exert their effect on outcome via the  
131 exposure, and (3) there must be no unmeasured confounders of the associations between the genetic  
132 variants and outcome (e.g. horizontal pleiotropy) (17). Importantly, SNPs are proper randomization  
133 instruments because they are determined at birth and thus serve as proxies of long-term exposures and  
134 cannot, in general, be modified by the environment. If the 3 above mentioned assumptions hold, MR-  
135 estimate effects of exposure on outcomes are not likely to be significantly affected by reverse causation  
136 or confounding. In the 2S-MR performed here, where GWAS summary statistics are used for both  
137 exposure and outcome from independent cohorts, reverse causation and horizontal pleiotropy can  
138 readily be assessed, and weak instrument bias and the likelihood of false positive findings are  
139 minimized as a result of the much larger samples sizes (17). Indeed, the bias in the 2S-MR using non-  
140 overlapping datasets as performed here is towards the null (17). Furthermore, to maintain the SNP-  
141 exposure associations and linkage disequilibrium (LD) patterns in the non-overlapping populations we  
142 used GWAS datasets from the MR-Base platform that were derived from ancestrally similar  
143 populations (“ukb”: analysis of UK Biobank phenotypes, and “ieu”: GWAS summary datasets  
144 generated by many different European consortia). To perform the analysis we used the R package  
145 “TwoSampleMR” that combines the effects sizes of instruments on exposures with those on outcomes  
146 via a meta-analysis. We used “TwoSampleMR” package functions for allele harmonization between  
147 exposure and outcome datasets, proxy variant substitution when SNPs from exposure were not  
148 genotyped in the outcome data ( $R_{sq} > 0.8$  using the 1000G EUR reference data integrated into MR-  
149 Base), and clumping to prune instrument SNPs for LD (the R script used for MR analyses is available  
150 upon request). We used 5 different MR methods that were included as part of the “TwoSampleMR”  
151 package to control for bias inherent to any one technique (18). For example, the multiplicative random  
152 effects inverse variance-weighted (IVW) method is a weighted regression of instrument-outcome  
153 effects on instrument-exposure effects with the intercept is set to zero. This method generates a causal  
154 estimate of the exposure trait on outcome traits by regressing the, for example, SNP-BMI trait  
155 association on the SNP-biomarker measure association, weighted by the inverse of the SNP-biomarker  
156 measure association, and constraining the intercept of this regression to zero. This constraint can result  
157 in unbalanced horizontal pleiotropy whereby the instruments influence the outcome through causal  
158 pathways distinct from that through the exposure (thus violating the second above-mentioned  
159 assumption). Such unbalanced horizontal pleiotropy distorts the association between the exposure and  
160 the outcome, and the effect estimate from the IVW method can be exaggerated or attenuated. However,  
161 unbalanced horizontal pleiotropy can be readily assessed by the MR Egger method (via the MR Egger  
162 intercept), which provides a valid MR causal estimate that is adjusted for the presence of such  
163 directional pleiotropy, albeit at the cost of statistical efficiency. Finally, to ascertain the directionality  
164 of the various causal relationships examined, we also performed each MR analysis in reverse where  
165 possible.

## 166 3 Results

### 167 *Study population characteristics*

168 Table 1 shows the demographic characteristics of the study population. We observed a  
169 significant trend toward younger individuals reporting higher running volume, with more than 75% of  
170 the professional (PRO) group falling between the ages of 18 and 35 (Table 1S). Significant differences  
171 were also observed in the distribution of males and females within study groups (Table 1). Moreover,  
172 higher running volume associated with significantly lower body mass index (BMI). Thus, moving  
173 forward, combined comparisons of blood biomarkers as they relate to running volume were adjusted  
174 for age, gender, and BMI.

### 175 *Endurance exercise exhibits a modest association with clusters of blood biomarker features*

176 In order to begin to understand the most important variables that may associate with endurance exercise  
177 in the form of running, we performed a principal component analysis (PCA), dividing the cohort into  
178 two most divergent groups in terms of exercise volume: PRO/high volume amateur (HVAM) and  
179 sedentary (SED) groups. Using propensity matching, PRO and amateur athletes who reported running  
180 >10h per week were combined into the PRO-HVAM group to balance out the sample size between the  
181 exercising and non-exercising groups. Using this approach, we did not observe a significant separation  
182 between these groups (data not shown). However, dividing this dataset further into males and females  
183 yielded a modest degree of separation, with hematological, inflammation, and lipid features, as well as  
184 BMI explaining some of the variance (Figure 1 A through D). We hypothesized that there may more  
185 subtle relationships between running volume and the blood biomarker features that contributed to  
186 distinguishing the endurance exercise and sedentary groups, thus we next performed ANOVA analyses  
187 stratified by running volume as categorized in Table 1.

### 188 *Significant trends in glycemic, hematological, blood lipid, and inflammatory serum traits with* 189 *increasing running volumes*

190 Weighted ANOVA analyses adjusted for age, gender, and BMI showed significant differences among  
191 groups for multiple blood biomarkers (Table 2 and 2S, Figures 2 and 3). We observed a trend toward  
192 lower HbA1c, hsCRP, RDW, WBC, ferritin, gamma-glutamyl transferase (GGT), and LDL. HDL,  
193 hemoglobin (Hb), transferrin saturation (TS), alanine aminotransferase (ALT), aspartate  
194 aminotransferase (AST), vitamin B12, folate, 25-hydroxy vitamin D, and creatine kinase (CK) tended  
195 to be higher with increasing reported training volume, particularly in PRO runners (Tables 2 and 2S,  
196 Figures 2 and 2S, Figure 3). Hct and Hb were higher only in PRO males, whereas increased running  
197 volume associated with upward trend in these biomarkers in females (Figure 3 A and B). Increased  
198 running volume was associated with markedly lower Fer in males, whereas female runners did not  
199 exhibit varying levels, and SED females showed increased levels (Figure 3 C). The low ferritin  
200 observed in male and female runners was not clinically significant. ALT positively associated with  
201 running volume in females only (Figure 2S). Serum and RBC magnesium (Mg) were both significantly  
202 lower in PRO runners relative to all other groups (Table 2 and Figure 3 D and E). Increasing levels  
203 of endurance exercise also appeared to be associated with higher sex-hormone binding globulin  
204 (SHBG), particularly in PRO male runners (Figure 3 F).

### 205 *Endurance exercise correlates with lower BMI across categories of genetic risk*

206 Using publicly available GWAS summary statistics, we constructed blood biomarker polygenic risk  
207 scores (PGSs) to explore potential genetic risk-mitigating effects of endurance exercise. Since only a



208 subset of the individuals in our cohort were genotyped, we aggregated the groups into 2 categories—  
209 PRO-HVAM and sedentary—to increase statistical power. This across-group sample size increase  
210 generally did not sufficiently power the ANOVA analysis to detect statistically significant trends (data  
211 not shown), though the BMI polygenic risk was suggestively mitigated for both males and female PRO-  
212 HVAM runners across categories of genetic risk (Figure 4 B).

### 213 *Increased running volume is associated with lower BMI which may drive biomarker changes*

214 We observed a significant decrease in the BMI with increased running volume for both males and  
215 females, and, although some of the biomarker differences between sedentary and exercising individuals  
216 remained significant after adjustment for BMI, their significance was attenuated (Figure 4 A, p-value  
217 attenuation data not shown). Thus, we hypothesized that decreasing BMI may be driving a significant  
218 portion of the observed variance in some of the biomarkers across the groups. Thus, to explore causal  
219 relationships between weight and biomarker changes, we performed 2S-MR with BMI-associated  
220 single-nucleotide polymorphisms (SNPs) as the instrumental variables (IVs) for a subset of the  
221 healthspan-related biomarkers where BMI explained a relatively large portion of the variance in our  
222 analysis. In general, these blood biomarkers associated with inflammation (hsCRP and RDW), lipid  
223 metabolism (Tg and HDL), glycemic control (HbA1c and Glu), as well as Alb and SHBG. We used  
224 GWAS summary statistics and found that most of these BMI-blood biomarker relationships examined  
225 directionally aligned with our study (except for LDL), and some were indicative of causal relationships  
226 in the BMI-biomarker direction even after considering directional pleiotropy (Table 3S). We  
227 entertained the possibility of reverse causality and thus repeated the 2S-MR using each of the  
228 biomarker levels as the exposure and BMI as the outcome, and the results were generally not significant  
229 (except for WBC – see Table 4S). Of note, to estimate the direct causal effects of running on blood  
230 parameters, we attempted to find an instrumental variable for to approximate running as the exposure  
231 from publicly available GWAS summary statistics. Toward this end, we found that increasing levels  
232 of vigorous physical activity did associate with lower hsCRP, HbA1C, higher HDL, and possibly  
233 higher SHBG (although the explained variance ( $R^2$ ) in this exposure was just 0.001009, the F statistic  
234 was 37.7, thus meeting the criteria of  $F > 10$  for minimizing weak instrument bias) (Figures 5 and 3S;  
235 Table 5S).

### 236 *Vigorous physical activity associates with healthier behaviors*

237 We hypothesized that those who exercise regularly may also partake in other healthful lifestyle habits  
238 that may be contributing to more optimal blood biomarker signatures of wellness. However, our  
239 dataset did not allow for systematic accounting of other lifestyle habits across all running groups. Thus,  
240 we again leveraged the potential of the 2S-MR approach to inform potential confounding associations  
241 between modifiable exposures and found that vigorous physical activity such as running is at least  
242 suggestively associated with several behaviors associated with improved health (Figure 4S). Our  
243 analysis showed that those who participate in increasing levels of vigorous physical activity may be  
244 less likely to eat processed meat (IVW  $p = 0.0000013$ ), sweets (IVW  $p = 0.32$ ), and nap during the day  
245 (IVW  $p = 0.13$ ), while increasing their intake of oily fish (IVW  $p = 0.029$ ), salad/raw vegetable intake  
246 (IVW  $p = 0.00016$ ), and fresh fruit (IVW  $p = 0.0027$ ) (Table 6S). Furthermore, following our  
247 assessment of reverse causality, we found evidence for the bidirectionality in the causal relationship  
248 between vigorous activity and napping during the day and salad/raw vegetable intake, perhaps  
249 suggesting some degree of confounding due to population stratification (Table 7S). The suggestive  
250 positive effect of fresh fruit and processed meat intake on vigorous physical activity appeared to violate  
251 MR assumption (3) (Figure 1S) (horizontal pleiotropy p-values 0.051 and 0.17, respectively – Figure  
252 5S).

## 253 4 Discussion

254 In this report, we describe the variance in wellness-related blood biomarkers among self-reported  
255 recreational runners, PRO runners, and individuals who do not report any exercise. Overall, we find  
256 that 1) recreational running as an exercise appears to be an effective intervention toward modifying  
257 several biomarkers indicative of improved metabolic health, 2) an apparent dose-response relationship  
258 between running volume and BMI may itself be responsible for a proportion of the apparent metabolic  
259 benefits, and 3) both PRO-level status and gender appear to associate with heterogeneous physiological  
260 responses, particularly in iron and magnesium metabolism, as well as some hormonal traits.

### 261 4.1 Self-reported running improves glycemia and lipidemia

262 We did not observe distinct clusters corresponding to self-reported high-volume/PRO runners and the  
263 sedentary upon dimension reduction. This is, perhaps, not unexpected due, in part, to the self-selected  
264 healthspan-oriented nature of our cohort, where even the sedentary subset of individuals tends to  
265 exhibit blood biomarker levels in the normal clinical reference ranges. Furthermore, the measurement  
266 of running volume via self-report may be vulnerable to overestimation, which may have contributed to  
267 the blending of sedentary and exercise groups with respect to the serum markers measured, resulting  
268 in only marginal separation between the groups (19, 20). However, we did observe significant  
269 individual blood biomarker variance with respect to reported running volumes when the dataset was  
270 subjected to ANOVA, even after adjustment for age, sex, and BMI.

271 From among glycemic control blood biomarkers, we were able to detect a relatively small exercise  
272 effect in both fasting glucose and HbA1c in this generally healthy cohort, where the average measures  
273 of glycemia were below the prediabetic thresholds in even the sedentary subset of the cohort. Larger  
274 exercise intervention effects on metabolic biomarkers may be expected in cohorts that include  
275 individuals with more clinically significant baseline values (21).

276 Similarly, blood lipids improved with higher self-reported running volume, and this result has been  
277 reported before in multiple controlled endurance exercise trials (22). The literature indicates that HDL  
278 and Tg are two exercise-modifiable blood lipid biomarkers, with HDL being the most widely reported  
279 to be modified by aerobic exercise (23, 24). Although the mechanism behind this is not entirely clear,  
280 it likely involves the modification of lecithin acyltransferase and lipoprotein lipase activities following  
281 exercise training (25). We observed a similar trend in our blood biomarker analysis, with HDL  
282 exhibiting an upward trend with increasing reported running volume. While we also found Tg and  
283 LDL to decrease with increasing exercise volume, these trends were less pronounced. Reports  
284 generally suggest that, in order to reduce LDL more consistently, the intensity of aerobic exercise must  
285 be high enough (23). In the case of Tg, baseline levels may have a significant impact on the exercise  
286 intervention effect, with individuals exhibiting higher baselines showing greater improvements (13).

287 Importantly, these results suggests that exercise has a significant effect on glycemic control and blood  
288 lipids even in the self-selected, already healthy individuals who are proactive about preventing  
289 cardiometabolic disease.

### 290 4.2 Self-reported running and serum proxies of systemic inflammation

291 Chronic low-grade inflammation is one of the major risk factors for compromised cardiovascular health  
292 and metabolic syndrome (MetS). While there is no shortage of inflammation-reducing intervention  
293 studies on CVD patients with clinically high levels of metabolic inflammation, there is less emphasis  
294 on modifiable lifestyle factors that can help stave off CVD and extend healthspan in the generally

295 healthy individual. Indeed, considering the pathological cardiovascular processes begin shortly after  
296 birth, prevention in asymptomatic individuals may be a more appropriate strategy toward decreasing  
297 the burden of CVD on the healthcare system (26).

298 Toward this end, increasing self-reported running volume appeared to associate with improved markers  
299 of inflammation, as shown by the lower levels of hsCRP, WBC, as well as ferritin. Of note, while the  
300 acute-phase protein, ferritin, is often used in the differential diagnosis of iron deficiency anemia, the  
301 biomarker's specificity appears to depend on the inflammatory state of the individual, as it associates  
302 with hsCRP and inflammation more than iron stores, particularly in those with higher BMI (27).  
303 Although serum ferritin and iron is reported to be lower in male and female elite athletes (28), the  
304 observed overall negative association of ferritin with increased running volume in our cohort may be  
305 an indication of lower levels of inflammation rather than compromised iron stores, particularly since  
306 the average ferritin level across all groups was above the clinical iron deficiency thresholds. Moreover,  
307 increased levels of ferritin have been associated with insulin resistance and lower levels of adiponectin  
308 in the general population, both indicators of increased systemic inflammation (29). Here, exercising  
309 groups with lower levels of ferritin also exhibited glycemic and blood lipid traits indicative of improved  
310 metabolic states, further supporting ferritin's role as an inflammation proxy. Finally, Hb, TS and iron  
311 tended to be higher in those who run for exercise compared to the SED group (with the TIBC lower),  
312 again suggesting that runners, including the PRO group, were iron-sufficient in this cohort.

### 313 **4.3 PRO athletes exhibit distinct biomarker signatures**

314 PRO athletes exhibited lower serum and RBC Mg, which may be indication of the often-reported  
315 endurance athlete hypomagnesaemia (30). While the serum Mg was still within normal clinical  
316 reference range for both PRO female and male athletes, RBC Mg, a more sensitive biomarker of Mg  
317 status (31), was borderline low in female PRO athletes and might suggest suboptimal dietary intakes  
318 and/or much higher volume of running training compared to the other running groups (i.e. >>10h  
319 /week). Indeed, this group also had elevated baseline CK and AST, which suggests a much higher  
320 training intensity and/or volume. Moreover, PRO level athletes had adequate iron status and serum  
321 B12 and folate in the upper quartile of the normal reference range, suggesting that these athletes'  
322 general nutrition status may have been adequate. These observations suggest that elite endurance  
323 runners may need to pay particular attention to their magnesium status.

324 Further, we observed higher levels of SHBG in PRO male runners, a biomarker whose levels positively  
325 correlate with various indexes of insulin sensitivity (32). However, since the average SHBG levels in  
326 the SED group were not clinically low in both sexes, the observed increase in SHBG levels induced by  
327 running in males may be a catabolic response, as cortisol levels in this group were also higher. Indeed,  
328 Popovic et al have shown that endurance exercise may increase SHBG, cortisol, and total testosterone  
329 levels at the expense of free testosterone levels (33). This could perhaps in part be explained by higher  
330 exercise-induced adiponectin levels, which have been shown to increase SHBG via cAMP kinase  
331 (AMPK) activation (34). However, since our data is observational, we cannot rule out overall energy  
332 balance as a significant contributor to SHBG levels. For example, caloric restriction (CR) has been  
333 shown to result in higher SHBG and cortisol levels (32).

334 Finally, regarding the abovementioned PRO group elevated AST and CK biomarkers, evidence  
335 suggests that normal reference ranges in both CK and AST in well-recovered athletes should be  
336 adjusted up, as training and competition have a profound, non-pathological, impact on the activity of  
337 these enzymes (35, 36). Indeed, the recommendation appears to be not to use reference intervals  
338 derived from the general population with hard-training (particularly competitive) athletes (36).



#### 339 **4.4 Effect of BMI on blood biomarkers**

340 Since the current study is a cross-sectional analysis of self-reported running, we could not rule out the  
341 possibility that factors other than exercise were the driving force behind the observed biomarker  
342 variance among the groups examined. While factors such as diet, sleep, and/or medication use were  
343 not readily ascertained in this free-living cohort at the time of this study, BMI was readily available to  
344 evaluate this biomarker's potential relative contribution to the observed mean biomarker differences  
345 among self-reported runner groups.

346 Multiple studies have attempted to uncouple the effects of exercise and BMI reduction on blood  
347 biomarker outcomes, with mixed results (37). For example, it is relatively well-known that acute bouts  
348 of exercise improve glucose metabolism, but long-term effects are less well described (38). Indeed,  
349 whether exercise without significant weight-loss is effective toward preventing metabolic disease (and  
350 the associated blood biomarker changes) is inconclusive. From the literature, it appears that, for  
351 endurance exercise to have significant effect on most blood biomarkers, the volume of exercise needs  
352 to be very high, and this typically results in significant reduction in weight. Thus, in practice, it is  
353 difficult to demonstrably uncouple the effects of significant exercise and the associated weight-loss,  
354 and the results may depend on the blood biomarker in question. Indeed, there is evidence that exercise  
355 without weight-loss does improve markers of insulin sensitivity but not chronic inflammation, with the  
356 latter apparently requiring a reduction in adiposity in the general population (39, 40, 41).

357 In our study of apparently healthy individuals, we observed a decreasing trend in BMI with increasing  
358 self-reported running volume, and, although this study was not longitudinal and we are thus unable to  
359 claim weight-loss, our 2S-MR analysis using BMI as the exposure nonetheless suggests this biomarker  
360 to be responsible for a significant proportion of the modification of some blood biomarkers.

#### 361 **4.5.1 Serum markers of systemic inflammation**

362 Through our 2S-MR analyses, we show that BMI is causally associated with markers of systemic  
363 inflammation, including RDW, folate, and hsCRP (27, 42, 43). Similar analyses have reported that  
364 genetic variants that associate with higher BMI were associated with higher CRP levels, but not the  
365 other way around (44). The prevailing mechanism proposed to explain this relationship appears to be  
366 the pathological nature of overweight/obesity-driven adipose tissue that results in secretion of  
367 proinflammatory cytokines such as IL-6 and TNF $\alpha$ , which then stimulate an acute hepatic response,  
368 resulting in increased hsCRP levels (among other effects) (45). Thus, our 2S-MR analyses and those  
369 of others (44) would indicate that the primary factor behind the lower systemic inflammation in our  
370 cohort may be the exercise-associated lower BMI and not running exercise per se, though the lower  
371 hsCRP in runners remained significant after adjustment for BMI in our analysis.

372 Indeed, although a major driver behind reduced systemic inflammation may be a reduction in BMI in  
373 the general population, additive effects of other lifestyle factors such as exercise cannot be excluded.  
374 For example, a large body of cross-sectional investigations does indicate that physically active  
375 individuals exhibit CRP levels that are 19-35% lower than less active individuals, even when adjusted  
376 for BMI as was the case in the current analysis (41). Further, it's been reported that physical activity  
377 at a frequency of as little as 1 day per week is associated with lower CRP in individuals who are  
378 otherwise sedentary, while more frequent exercise further reduces inflammation (41).

379 Significantly, our entire cohort of self-selected apparently healthy individuals did not exhibit clinically  
380 high hsCRP, with average BMI also below the overweight thresholds. Because all subjects were  
381 voluntarily participating in a personalized wellness platform intended to optimize blood biomarkers

382 that included hsCRP, it is possible that some individuals from across the study groups (both running  
383 and sedentary) in our cohort partook in some form of inflammation-reducing dietary and/or lifestyle-  
384 based intervention. Thus, that we detected a significant difference in hsCRP between exercising and  
385 non-exercising individuals in this self-selected already generally healthy cohort may be suggestive of  
386 the potential for additional preventative effect of scheduled physical activity on low-grade systemic  
387 inflammation in the generally healthy individual.

#### 388 **4.5.2 Blood lipids**

389 Controlled studies that tightly track exercise and the associated adiposity reduction have reported that  
390 body fat reduction (and not improvement in fitness as measured via  $VO_{2max}$ ) is a predictor of HDL,  
391 LDL, and Tg (46). Similarly, though BMI is an imperfect measure of adiposity, our 2S-MR analysis  
392 suggests that this biomarker is causally associated with improved levels of HDL and Tg, though not  
393 LDL. This latter finding replicates a report by Hu et al. who, using the Global Lipids Genetics  
394 Consortium GWAS summary statistics, applied a network MR approach that revealed causal  
395 associations between BMI and blood lipids, where Tg and HDL, but not LDL, were found to trend  
396 toward unhealthy levels with increasing adiposity (47). On the other hand, others implemented a robust  
397 BMI genetic risk score and demonstrated a causal association of adiposity with peripheral artery  
398 disease and a multiple linear regression showed a strong association with HDL, TC, and LDL, among  
399 other metabolic parameters (48). In our cohort, given the lack of evidence for a causal BMI-LDL  
400 association and the overall healthy levels of BMI, the observed a significant improvement in LDL may  
401 be a result of marked running intensity and/or volume, possibly combined with the aforementioned  
402 additional wellness program intervention variables.

#### 403 **4.5.3 Hormonal traits**

404 As described above, we observed a trend toward increased plasma cortisol and SHBG in runners,  
405 particularly PRO level athletes. The effects on cortisol are consistent with a report by Houmanrd et al,  
406 who found male distance runners to exhibit higher levels of baseline cortisol (49). With respect to the  
407 effects of BMI on baseline cortisol levels, this observation is generally supported by our 2S-MR  
408 analyses with evidence for a consistent effect of increased cortisol with decreasing BMI. However,  
409 this association was suggestive at best, indicating that the higher levels of cortisol exhibited in the PRO  
410 runners with significant lower adiposity are not likely to be solely explained by their lower BMI.  
411 Indeed, the relationship between BMI and cortisol appears to be complex, with some reports suggesting  
412 a U-shaped relationship, where the glucocorticoid's levels associate negatively up to about a BMI of  
413 30 kg/m<sup>2</sup>, then exhibiting a positive correlation into obesity phenotypes (50). MR statistical models  
414 generally do not account for such non-linearity and would require a more granular demographical  
415 treatment, which is not possible using only GWAS summary statistics data in the context of 2S-MR  
416 (17, 51).

#### 417 **4.6 Behavioral traits associated with increase physical activity**

418 The combination of the body of the literature that describes the effects of endurance training on blood  
419 biomarkers, and our own analysis that included markers such as CK and AST, makes us cautiously  
420 assured that most of the abovementioned blood biomarker signatures are indeed a result of the interplay  
421 between self-reported running and the associated lower BMI. However, as this is a self-report-based  
422 analysis and we were unable to track other subject behaviors in this free-living cohort, we acknowledge  
423 that multiple behaviors that associate with exercise may be influencing our results.

424 Toward this end, our exploratory 2S-MR analyses revealed potentially causal relationships between  
425 vigorous exercise and multiple dietary habits that have been shown to improve the biomarkers we  
426 examined. Indeed, diets that avoid processed meat and sweets while providing ample amounts of fresh  
427 fruits, as well as oily fish have been shown to be anti-inflammatory, and improve glycemic control and  
428 dyslipidemia (52, 53). That physically active individuals are also more likely to make healthier dietary  
429 choices adds insight to the potential confounders in ours and others' observational analyses, and this  
430 similar associations have previously been reported (54, 55, 56). For example, using a calculated healthy  
431 eating motivation score, Naughton et al. showed that those who partake in more than 2 hours of  
432 vigorous physical activity are almost twice as likely to be motivated to eat healthy (56). Indeed, upon  
433 closer examination, the genetic instruments used to approximate vigorous physical activity as the  
434 exposure in this work included variants in the genes *DPY19L1*, *CADM2*, *CTBP2*, *EXOC4*, and *FOXO3*  
435 (57). Of these, *CADM2* encodes proteins that are involved in neurotransmission in brain regions well  
436 known for their involvement in executive function, including motivation, impulse regulation and self-  
437 control (58). Moreover, variants within this locus have been associated with obesity-related traits (59).  
438 Thus, it is likely that the improved metabolic outcomes seen here with our self-reported runners are a  
439 composite result of both these individuals exercise and dietary habits. Importantly, the above suggests  
440 that a holistic wellness lifestyle approach is in practice the most likely to be most effective toward  
441 preventing cardiometabolic disease. Nonetheless, the focus of this work – exercise in the form of  
442 running – is known to significantly improve cardiorespiratory fitness (CRF), which has been shown  
443 to be an independent predictor of CVD risk and total mortality, outcomes that indeed correlate with  
444 dysregulated levels in many of the blood biomarkers examined in this work (7).

#### 445 4.7 Study limitations

446 This study is based on self-reported running and thus has several limitations. First, it is generally  
447 known that subjects tend to overestimate their commitment to exercise when self-reporting, although  
448 in our cohort is a self-selected health-oriented population that is possibly less likely to over-report their  
449 running volume. Furthermore, although the robust increasing trend in baselines for muscle damage  
450 biomarkers (CK, AST) that have been shown to be associated with participation in sports and exercise  
451 provides indirect evidence that the running groups were indeed participating in increasing volumes of  
452 strenuous physical activity, we cannot confirm whether the reported running was performed  
453 overground or on a treadmill, which may result in some heterogeneity in physiological responses, nor  
454 can we ascertain the actual training volume of PRO-level runners. We also cannot exclude the  
455 possibility that the running groups also participated in other forms of exercise (such as strength  
456 training) or partook in other wellness program interventions that may have influenced their blood  
457 biomarkers and/or BMI via lean muscle accretion, though we have attempted to shed light on potential  
458 behavioral covariates via 2S-MR. Finally, while this cohort is generally healthy, we cannot exclude  
459 the potential for unmeasured confounders such as medications, nutritional supplements, and unreported  
460 health conditions.

461 2S- MR enables the assessment of causal relationships between modifiable traits and is less prone to  
462 the so-called “winner’s curse” that more readily affects one-sample MR analyses (17, 51). Because  
463 2S-MR uses GWAS summary statistics for both exposure and outcome, it is possible to increase  
464 statistical power because of the increased sample sizes. However, horizontal pleiotropy is still a  
465 concern that can skew the results. Currently, there is no gold standard MR analysis method, thus we  
466 used different techniques (IVW, MR-Egger, and median-based estimations – all of which are based on  
467 different assumptions and thus biases) to evaluate the consistency among these estimators and only  
468 reported associations as ‘causal’ if there was cross-model consistency. Nonetheless, an exposure such

469 as BMI is a complex trait that is composed of multiple sub-phenotypes (such as years of education)  
470 that could be driving the causal associations.

471

## 472 **5 Conclusion**

473 Running is one of the most common forms of vigorous exercise practiced globally, thus making it a  
474 compelling target of research studies toward understanding its applicability in chronic disease  
475 prevention. Our cross-sectional study offers insight into the biomarker signatures of self-reported  
476 running in generally healthy individuals that suggest improved insulin sensitivity, blood lipid  
477 metabolism, and systemic inflammation. Furthermore, using 2S-MR in independent datasets we  
478 provide additional evidence that some biomarkers are readily modified BMI alone, while others appear  
479 to respond to the combination of varying exercise and BM  
480 I. Our additional bi-directional 2S-MR analyses toward understanding the causal relationships between  
481 partaking in vigorous physical activity and other healthy behaviors highlight the inherent challenge in  
482 disambiguating exercise intervention effects in cross sectional studies of free-living populations, where  
483 healthy behaviors such as exercising and healthy dietary habits co-occur. Overall, our analysis shows  
484 that the differences between those who run and the sedentary in our cohort are likely a combination of  
485 the specific physiological effects of exercise, the associated changes in BMI, and lifestyle habits  
486 associated with those who exercise, such as food choices and baseline activity level. Looking ahead,  
487 the InsideTracker database is continuously augmented with blood chemistry, genotyping, and activity  
488 tracker data, facilitating further investigation of the effects of various exercise modalities on  
489 phenotypes related to healthspan, including longitudinal analyses and more granular dose-response  
490 dynamics.

## 491 **Data Availability Statement**

492 The full set of biomarker change correlations has been made available in the Supplementary  
493 Information files. Specific components of the raw dataset are available upon reasonable request from  
494 the corresponding author. 2S-MR analysis was performed using publicly available datasets via the  
495 TwoSampleMR R package.

## 496 **Ethics statement**

497 This study was submitted to The Institutional Review Board (IRB), which determined this work was  
498 not subject to a review based on category 4 exemption (“secondary research” with de-identified  
499 subjects).

## 500 **Author contributions**

501 BN performed the 2S-MR analyses, calculated PGSs, and wrote the manuscript; SV performed blood  
502 biomarker and blood biomarker X PGS interaction analysis; PF calculated PGSs; MJ, AT, and GB  
503 provided guidance. All authors have read and agreed to the published version of the manuscript.

## 504 **Funding**

505 InsideTracker was the sole funding source.

## 506 **Acknowledgments**



507 InsideTracker is the sole funding source. We thank Michelle Cawley and Renee Deehan for their  
508 assistance with background subject matter research and insightful conversations.

### 509 **Conflict of interest**

510 InsideTracker is a direct-to-consumer blood biomarker and genomics company providing its users  
511 with nutritional and exercise recommendations toward improving wellness. B.N., S.V., P.F., and  
512 G.B. are employees of InsideTracker.

### 513 **References**

- 514 1. Lavie CJ, Ozemek C, Carbone S, Katzmarzyk PT, Blair SN. Sedentary Behavior, Exercise, and  
515 Cardiovascular Health. *Circ Res.* 2019;124(5):799-815.
- 516 2. Carlson SA, Adams EK, Yang Z, Fulton JE. Percentage of Deaths Associated With Inadequate  
517 Physical Activity in the United States. *Prev Chronic Dis.* 2018;15:E38.
- 518 3. Antonicelli R, Spazzafumo L, Scavini S, Olivieri F, Matassini MV, Parati G, et al. Exercise: a  
519 "new drug" for elderly patients with chronic heart failure. *Aging (Albany NY).* 2016;8(5):860-72.
- 520 4. Sgro P, Emerenziani GP, Antinozzi C, Sacchetti M, Di Luigi L. Exercise as a drug for glucose  
521 management and prevention in type 2 diabetes mellitus. *Curr Opin Pharmacol.* 2021;59:95-102.
- 522 5. Vina J, Sanchis-Gomar F, Martinez-Bello V, Gomez-Cabrera MC. Exercise acts as a drug; the  
523 pharmacological benefits of exercise. *Br J Pharmacol.* 2012;167(1):1-12.
- 524 6. Lee EC, Fragala MS, Kavouras SA, Queen RM, Pryor JL, Casa DJ. Biomarkers in Sports and  
525 Exercise: Tracking Health, Performance, and Recovery in Athletes. *J Strength Cond Res.*  
526 2017;31(10):2920-37.
- 527 7. Lin X, Zhang X, Guo J, Roberts CK, McKenzie S, Wu WC, et al. Effects of Exercise Training on  
528 Cardiorespiratory Fitness and Biomarkers of Cardiometabolic Health: A Systematic Review and  
529 Meta-Analysis of Randomized Controlled Trials. *J Am Heart Assoc.* 2015;4(7).
- 530 8. Li X, Ploner A, Wang Y, Zhan Y, Pedersen NL, Magnusson PK, et al. Clinical biomarkers and  
531 associations with healthspan and lifespan: Evidence from observational and genetic data.  
532 *EBioMedicine.* 2021;66:103318.
- 533 9. Mailliez A, Guilbaud A, Puisieux F, Dauchet L, Boulanger E. Circulating biomarkers  
534 characterizing physical frailty: CRP, hemoglobin, albumin, 25OHD and free testosterone as best  
535 biomarkers. Results of a meta-analysis. *Exp Gerontol.* 2020;139:111014.
- 536 10. Hirata T, Arai Y, Yuasa S, Abe Y, Takayama M, Sasaki T, et al. Associations of cardiovascular  
537 biomarkers and plasma albumin with exceptional survival to the highest ages. *Nat Commun.*  
538 2020;11(1):3820.
- 539 11. Erema VV, Yakovchik AY, Kashtanova DA, Bochkaeva ZV, Ivanov MV, Sosin DV, et al.  
540 Biological Age Predictors: The Status Quo and Future Trends. *Int J Mol Sci.* 2022;23(23).
- 541 12. Hartmann A, Hartmann C, Secci R, Hermann A, Fuellen G, Walter M. Ranking Biomarkers of  
542 Aging by Citation Profiling and Effort Scoring. *Front Genet.* 2021;12:686320.
- 543 13. Trejo-Gutierrez JF, Fletcher G. Impact of exercise on blood lipids and lipoproteins. *J Clin*  
544 *Lipidol.* 2007;1(3):175-81.
- 545 14. Westerman K, Reaver A, Roy C, Ploch M, Sharoni E, Nogal B, et al. Longitudinal analysis of  
546 biomarker data from a personalized nutrition platform in healthy subjects. *Sci Rep.*  
547 2018;8(1):14685.
- 548 15. Fox J WS. *An R Companion to Applied Regression.* Third ed: Sage, Thousand Oaks CA; 2019.

- 549 16. Ho D, Imai K, King G, Stuart EA. MatchIt: Nonparametric Preprocessing for Parametric Causal  
550 Inference. *Journal of Statistical Software*. 2011;42(8):1 - 28.
- 551 17. Burgess S, Davey Smith G, Davies NM, Dudbridge F, Gill D, Glymour MM, et al. Guidelines for  
552 performing Mendelian randomization investigations. *Wellcome Open Res*. 2019;4:186.
- 553 18. Hemani G, Zheng J, Elsworth B, Wade KH, Haberland V, Baird D, et al. The MR-Base platform  
554 supports systematic causal inference across the human phenome. *Elife*. 2018;7.
- 555 19. Bogl LH, Pietilainen KH, Rissanen A, Kaprio J. Improving the accuracy of self-reports on diet  
556 and physical exercise: the co-twin control method. *Twin Res Hum Genet*. 2009;12(6):531-40.
- 557 20. Yuen HK, Wang E, Holthaus K, Vogtle LK, Sword D, Breland HL, et al. Self-reported versus  
558 objectively assessed exercise adherence. *Am J Occup Ther*. 2013;67(4):484-9.
- 559 21. Ostman C, Smart NA, Morcos D, Duller A, Ridley W, Jewiss D. The effect of exercise training  
560 on clinical outcomes in patients with the metabolic syndrome: a systematic review and meta-  
561 analysis. *Cardiovasc Diabetol*. 2017;16(1):110.
- 562 22. Fikenzer K, Fikenzer S, Laufs U, Werner C. Effects of endurance training on serum lipids.  
563 *Vascul Pharmacol*. 2018;101:9-20.
- 564 23. Mann S, Beedie C, Jimenez A. Differential effects of aerobic exercise, resistance training and  
565 combined exercise modalities on cholesterol and the lipid profile: review, synthesis and  
566 recommendations. *Sports Med*. 2014;44(2):211-21.
- 567 24. Tambalis K, Panagiotakos DB, Kavouras SA, Sidossis LS. Responses of blood lipids to aerobic,  
568 resistance, and combined aerobic with resistance exercise training: a systematic review of current  
569 evidence. *Angiology*. 2009;60(5):614-32.
- 570 25. Calabresi L, Franceschini G. Lecithin:cholesterol acyltransferase, high-density lipoproteins,  
571 and atheroprotection in humans. *Trends Cardiovasc Med*. 2010;20(2):50-3.
- 572 26. Kemper HC, Snel J, Verschuur R, Storm-van Essen L. Tracking of health and risk indicators of  
573 cardiovascular diseases from teenager to adult: Amsterdam Growth and Health Study. *Prev Med*.  
574 1990;19(6):642-55.
- 575 27. Khan A, Khan WM, Ayub M, Humayun M, Haroon M. Ferritin Is a Marker of Inflammation  
576 rather than Iron Deficiency in Overweight and Obese People. *J Obes*. 2016;2016:1937320.
- 577 28. Nabhan D, Bielko S, Sinex JA, Surhoff K, Moreau WJ, Schumacher YO, et al. Serum ferritin  
578 distribution in elite athletes. *J Sci Med Sport*. 2020;23(6):554-8.
- 579 29. Ku BJ, Kim SY, Lee TY, Park KS. Serum ferritin is inversely correlated with serum adiponectin  
580 level: population-based cross-sectional study. *Dis Markers*. 2009;27(6):303-10.
- 581 30. Pollock N, Chakraverty R, Taylor I, Killer SC. An 8-year Analysis of Magnesium Status in Elite  
582 International Track & Field Athletes. *J Am Coll Nutr*. 2020;39(5):443-9.
- 583 31. Arnaud MJ. Update on the assessment of magnesium status. *Br J Nutr*. 2008;99 Suppl 3:S24-  
584 36.
- 585 32. Simo R, Saez-Lopez C, Barbosa-Desongles A, Hernandez C, Selva DM. Novel insights in SHBG  
586 regulation and clinical implications. *Trends Endocrinol Metab*. 2015;26(7):376-83.
- 587 33. Popovic B, Popovic D, Macut D, Antic IB, Isailovic T, Ognjanovic S, et al. Acute Response to  
588 Endurance Exercise Stress: Focus on Catabolic/anabolic Interplay Between Cortisol, Testosterone,  
589 and Sex Hormone Binding Globulin in Professional Athletes. *J Med Biochem*. 2019;38(1):6-12.
- 590 34. Simo R, Saez-Lopez C, Lecube A, Hernandez C, Fort JM, Selva DM. Adiponectin upregulates  
591 SHBG production: molecular mechanisms and potential implications. *Endocrinology*.  
592 2014;155(8):2820-30.
- 593 35. Mougios V. Reference intervals for serum creatine kinase in athletes. *Br J Sports Med*.  
594 2007;41(10):674-8.

- 595 36. Banfi G, Morelli P. Relation between body mass index and serum aminotransferases  
596 concentrations in professional athletes. *J Sports Med Phys Fitness*. 2008;48(2):197-200.
- 597 37. Ross R, Janiszewski PM. Is weight loss the optimal target for obesity-related cardiovascular  
598 disease risk reduction? *Can J Cardiol*. 2008;24 Suppl D:25D-31D.
- 599 38. Ross R. Does exercise without weight loss improve insulin sensitivity? *Diabetes Care*.  
600 2003;26(3):944-5.
- 601 39. Cerqueira E, Marinho DA, Neiva HP, Lourenco O. Inflammatory Effects of High and Moderate  
602 Intensity Exercise-A Systematic Review. *Front Physiol*. 2019;10:1550.
- 603 40. Church TS, Earnest CP, Thompson AM, Priest EL, Rodarte RQ, Saunders T, et al. Exercise  
604 without weight loss does not reduce C-reactive protein: the INFLAME study. *Med Sci Sports Exerc*.  
605 2010;42(4):708-16.
- 606 41. Plaisance EP, Grandjean PW. Physical activity and high-sensitivity C-reactive protein. *Sports*  
607 *Med*. 2006;36(5):443-58.
- 608 42. Salvagno GL, Sanchis-Gomar F, Picanza A, Lippi G. Red blood cell distribution width: A simple  
609 parameter with multiple clinical applications. *Crit Rev Clin Lab Sci*. 2015;52(2):86-105.
- 610 43. Carmel R, Green R, Rosenblatt DS, Watkins D. Update on cobalamin, folate, and  
611 homocysteine. *Hematology Am Soc Hematol Educ Program*. 2003:62-81.
- 612 44. Welsh P, Polisecki E, Robertson M, Jahn S, Buckley BM, de Craen AJ, et al. Unraveling the  
613 directional link between adiposity and inflammation: a bidirectional Mendelian randomization  
614 approach. *J Clin Endocrinol Metab*. 2010;95(1):93-9.
- 615 45. Maachi M, Pieroni L, Bruckert E, Jardel C, Fellahi S, Hainque B, et al. Systemic low-grade  
616 inflammation is related to both circulating and adipose tissue TNFalpha, leptin and IL-6 levels in  
617 obese women. *Int J Obes Relat Metab Disord*. 2004;28(8):993-7.
- 618 46. Katzmarzyk PT, Leon AS, Rankinen T, Gagnon J, Skinner JS, Wilmore JH, et al. Changes in  
619 blood lipids consequent to aerobic exercise training related to changes in body fatness and aerobic  
620 fitness. *Metabolism*. 2001;50(7):841-8.
- 621 47. Hu X, Zhuang XD, Mei WY, Liu G, Du ZM, Liao XX, et al. Exploring the causal pathway from  
622 body mass index to coronary heart disease: a network Mendelian randomization study. *Ther Adv*  
623 *Chronic Dis*. 2020;11:2040622320909040.
- 624 48. Huang Y, Xu M, Xie L, Wang T, Huang X, Lv X, et al. Obesity and peripheral arterial disease: A  
625 Mendelian Randomization analysis. *Atherosclerosis*. 2016;247:218-24.
- 626 49. Houmard JA, Costill DL, Mitchell JB, Park SH, Fink WJ, Burns JM. Testosterone, cortisol, and  
627 creatine kinase levels in male distance runners during reduced training. *Int J Sports Med*.  
628 1990;11(1):41-5.
- 629 50. Schorr M, Lawson EA, Dichtel LE, Klibanski A, Miller KK. Cortisol Measures Across the Weight  
630 Spectrum. *J Clin Endocrinol Metab*. 2015;100(9):3313-21.
- 631 51. O'Donnell CJ, Sabatine MS. Opportunities and Challenges in Mendelian Randomization  
632 Studies to Guide Trial Design. *JAMA Cardiol*. 2018;3(10):967.
- 633 52. Hosseini B, Berthon BS, Saedisomeolia A, Starkey MR, Collison A, Wark PAB, et al. Effects of  
634 fruit and vegetable consumption on inflammatory biomarkers and immune cell populations: a  
635 systematic literature review and meta-analysis. *Am J Clin Nutr*. 2018;108(1):136-55.
- 636 53. Djousse L, Arnett DK, Coon H, Province MA, Moore LL, Ellison RC. Fruit and vegetable  
637 consumption and LDL cholesterol: the National Heart, Lung, and Blood Institute Family Heart Study.  
638 *Am J Clin Nutr*. 2004;79(2):213-7.
- 639 54. L D. Physical Activity and Dietary Habits of College Students. *The Journal of Nurse*  
640 *Practitioners*. 2015;11(2):192-8.e2.

- 641 55. Shi X, Tubb L, Fingers ST, Chen S, Caffrey JL. Associations of physical activity and dietary  
642 behaviors with children's health and academic problems. *J Sch Health*. 2013;83(1):1-7.
- 643 56. Naughton P, McCarthy SN, McCarthy MB. The creation of a healthy eating motivation score  
644 and its association with food choice and physical activity in a cross sectional sample of Irish adults.  
645 *Int J Behav Nutr Phys Act*. 2015;12:74.
- 646 57. Klimentidis YC, Raichlen DA, Bea J, Garcia DO, Wineinger NE, Mandarino LJ, et al. Genome-  
647 wide association study of habitual physical activity in over 377,000 UK Biobank participants  
648 identifies multiple variants including CADM2 and APOE. *Int J Obes (Lond)*. 2018;42(6):1161-76.
- 649 58. Arends RM, Pasman JA, Verweij KJH, Derks EM, Gordon SD, Hickie I, et al. Associations  
650 between the CADM2 gene, substance use, risky sexual behavior, and self-control: A phenome-wide  
651 association study. *Addict Biol*. 2021;26(6):e13015.
- 652 59. Morris J, Bailey MES, Baldassarre D, Cullen B, de Faire U, Ferguson A, et al. Genetic variation  
653 in CADM2 as a link between psychological traits and obesity. *Scientific Reports*. 2019;9(1):7339.  
654
- 655
- 656
- 657
- 658
- 659
- 660
- 661
- 662

**Figure 1.** Principal component analysis and variables plots of PRO-HVAM runners and sedentary user blood biomarkers. Females, (A) and (B); males (C) and (D). PRO-HVAM = combined professional and high-volume amateur. Alb = albumin, ALT = alanine transaminase, AST = aspartate aminotransferase, B12 = vitamin B12, Ca = calcium, Chol = total cholesterol, CK = creatine kinase, Cor = cortisol, FE = iron, EOS\_PCT = eosinophil percentage, Fer = ferritin, Fol = folate, FT = free testosterone, GGT = gamma-glutamyl transferase, Glu = glucose, Hb = hemoglobin, HCT = hematocrit, HDL = high density lipoprotein, HbA1c = glycated hemoglobin, hsCRP = high-sensitivity C-reactive protein, LDL = low density lipoprotein, LYMPS\_PCT = lymphocyte percentage, MCH = mean cell hemoglobin, Mg = magnesium, MONOS\_PCT = monocytes



percentage, MPV = mean platelet volume, Na = sodium, RBC = red blood cells, RBC\_Mg = red blood cell magnesium, RDW = red blood cell distribution width, SHBG = sex hormone binding globulin, Tg = triglycerides, TIBC = total iron binding capacity, WBC = white blood cells.

**Figure 2.** Blood biomarkers associated with running: Inflammation proxies, (A) hsCRP = high-sensitivity C-reactive protein and (B) WBC = white blood cells; blood lipids, (C) HDL = high density lipoprotein (D) LDL = low density lipoprotein, and (E) Tg = triglycerides; glycemia proxies, (F) Glu = glucose and (G) HgbA1c = glycated hemoglobin, and (H) Cor =cortisol

**Figure 3.** Blood biomarkers associated with running: (A and B) Hb (hemoglobin) and Hct (hematocrit) increase with increasing running volume, (C) Fer (ferritin) is reduced with increasing running volume, (D and E) Serum and RBC Mg (red blood cell magnesium) are reduced in professional runners, and (F) SHBG (sex hormone binding globulin) levels increase with increasing running volume in males

**Figure 4.** BMI significantly varied among running groups (A) with some suggestive effects on BMI PGS modification (total number for observations (N) for T1, T2, and T3 were 87, 84, and 100, respectively) (B) T1, T2, and T3 = 1<sup>st</sup>, and 2<sup>nd</sup> and 3<sup>rd</sup> tertials of the polygenic score distribution

**Figure 5** Two-sample Mendelian randomization shows that increasing levels of vigorous physical activity such as running is associated with improvement of (A) hsCRP = high-sensitivity C-reactive protein, (B) HDL = high density lipoprotein, and (C) HbA1c = glycated hemoglobin levels

663 **Table 1 Study Population Demographics**

| Group | N | Female, % | Age, yrs | Body mass index, kg/m <sup>2</sup> |
|-------|---|-----------|----------|------------------------------------|
|-------|---|-----------|----------|------------------------------------|

|             |       |       |       |       |
|-------------|-------|-------|-------|-------|
| <b>PRO</b>  | 82    | 53.7% | 33.68 | 20.15 |
| <b>HVAM</b> | 1103  | 52.9% | 39.48 | 22.57 |
| <b>MVAM</b> | 6747  | 54.2% | 41.49 | 23.35 |
| <b>LVAM</b> | 10877 | 34.2% | 41.16 | 24.72 |
| <b>SED</b>  | 4428  | 48.9% | 44.25 | 27.83 |

664 PRO = Professional, HVAM = high volume amateur (>10 hr), MVAM = medium  
 665 volume amateur (3-10hr), LVAM = low volume amateur (<3 hr), SED = sedentary

666 **Table 2** Blood Biomarkers Significantly Different Among Sedentary  
 667 Individuals and Those Who Partake in Running for Exercise to Various  
 668 Degrees

| Biomarker | ANOVA p-value | Trend p-value | lowest mean | highest mean |
|-----------|---------------|---------------|-------------|--------------|
| Alb       | <1e-16        | <0.001        | MVAM        | PRO          |
| ALT       | <1e-16        | <1e-16        | SED         | PRO          |
| AST       | <1e-16        | <0.001        | SED         | PRO          |
| B12       | <0.001        | <0.001        | SED         | PRO          |
| Chol      | <0.001        | 0.005         | PRO         | SED          |
| CK        | <1e-16        | <1e-16        | SED         | PRO          |
| Cor       | <0.001        | 0.675         | SED         | PRO          |
| FE        | <0.001        | 0.119         | SED         | PRO          |

|        |        |                  |      |      |
|--------|--------|------------------|------|------|
| Fer    | <1e-16 | <b>&lt;1e-16</b> | MVAM | SED  |
| Fol    | <1e-16 | <b>&lt;0.001</b> | SED  | PRO  |
| FT     | <0.001 | <b>0.013</b>     | SED  | PRO  |
| GGT    | <1e-16 | <b>&lt;0.001</b> | PRO  | SED  |
| Glu    | 0.087  | 0.184            | PRO  | SED  |
| Hb     | 0.002  | <b>&lt;0.001</b> | MVAM | PRO  |
| HCT    | 0.053  | 0.055            | MVAM | PRO  |
| HDL    | <1e-16 | <b>&lt;0.001</b> | SED  | PRO  |
| HbA1c  | <0.001 | <b>0.010</b>     | PRO  | SED  |
| hsCRP  | <0.001 | <b>0.176</b>     | PRO  | SED  |
| LDL    | <0.001 | <b>0.006</b>     | PRO  | SED  |
| Mg     | <0.001 | 0.276            | PRO  | SED  |
| MPV    | 0.058  | 0.089            | SED  | HVAM |
| Na     | <1e-16 | 0.622            | HVAM | SED  |
| RBC_Mg | <0.001 | 0.773            | PRO  | SED  |
| RDW    | <1e-16 | <b>0.002</b>     | PRO  | SED  |
| SHBG   | <1e-16 | <b>0.004</b>     | SED  | PRO  |
| Tg     | <1e-16 | <b>&lt;1e-16</b> | PRO  | SED  |
| WBC    | <1e-16 | <b>&lt;1e-16</b> | PRO  | SED  |



669

670

**Individuals – PCA**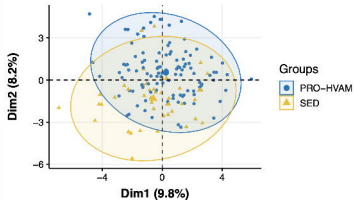**Variables – PCA**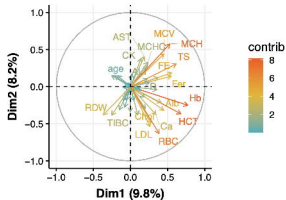**Individuals – PCA**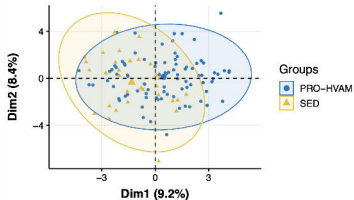**Variables – PCA**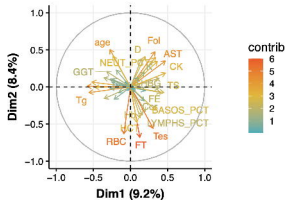

**hsCRP****WBC****HDL**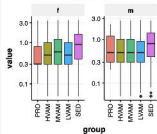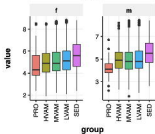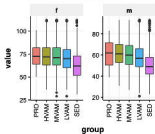**LDL****Tg****Glu**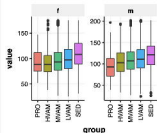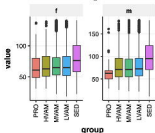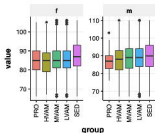**HgbA1c****Cor**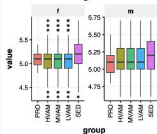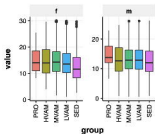

**HCT**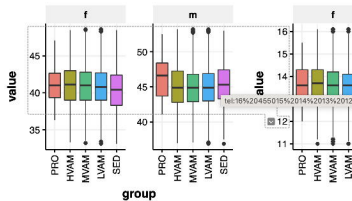**Hb**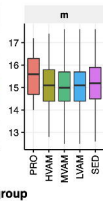**Fer**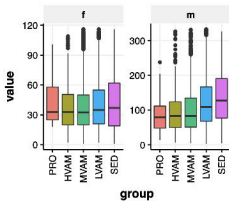**Mg**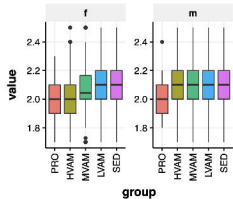**RBC\_Mg**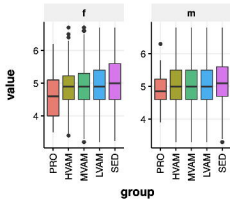**SHBG**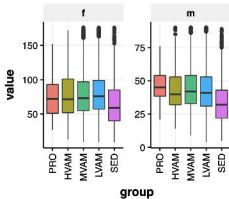

## bmi

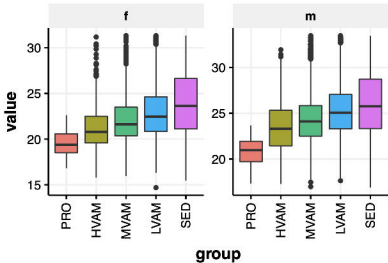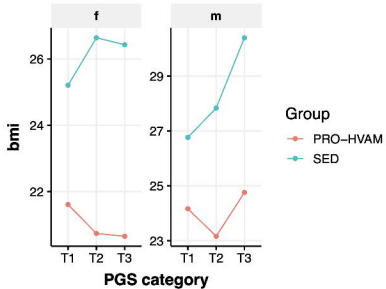



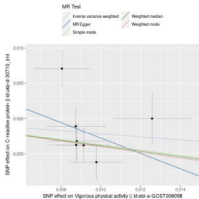

| Exposure-outcome         | Method                    | Causal estimate |        |       |          |
|--------------------------|---------------------------|-----------------|--------|-------|----------|
|                          |                           | SNP             | Beta   | SE    | p        |
| Vigorous activity to CRP | MR Egger                  | 7               | -0.088 | 1.603 | 5.28E-01 |
|                          | Weighted median           | 7               | -0.185 | 0.145 | 8.20E-04 |
|                          | Inverse variance weighted | 7               | -0.205 | 0.170 | 2.90E-01 |
|                          | Simple mode               | 7               | -0.172 | 0.184 | 6.89E-02 |
|                          | Weighted mode             | 7               | -0.199 | 0.182 | 7.46E-02 |

Test for horizontal pleiotropy: MR Egger intercept = 0.00812, SE = 0.01148, p = 0.887

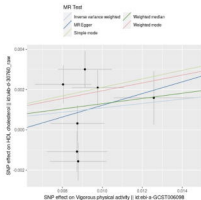

| Exposure-outcome      | Method                    | Causal estimate |       |       |          |
|-----------------------|---------------------------|-----------------|-------|-------|----------|
|                       |                           | SNP             | Beta  | SE    | p        |
| Vigorous activity HDL | MR Egger                  | 7               | 0.292 | 0.864 | 6.79E-02 |
|                       | Weighted median           | 7               | 0.193 | 0.265 | 5.09E-02 |
|                       | Inverse variance weighted | 7               | 0.239 | 0.272 | 1.92E-02 |
|                       | Simple mode               | 7               | 0.213 | 0.236 | 1.09E-04 |
|                       | Weighted mode             | 7               | 0.198 | 0.255 | 5.13E-02 |

Test for horizontal pleiotropy: MR Egger intercept = -0.00268, SE = 0.00012, p = 0.793

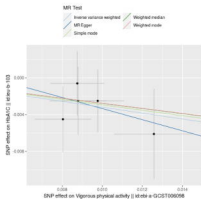

| Exposure-outcome           | Method                    | Causal estimate |        |       |          |
|----------------------------|---------------------------|-----------------|--------|-------|----------|
|                            |                           | SNP             | Beta   | SE    | p        |
| Vigorous activity to HbA1c | MR Egger                  | 5               | -0.601 | 1.215 | 6.44E-01 |
|                            | Weighted median           | 5               | -0.278 | 0.207 | 1.80E-01 |
|                            | Inverse variance weighted | 5               | -0.109 | 0.178 | 7.20E-02 |
|                            | Simple mode               | 5               | -0.194 | 0.298 | 3.62E-01 |
|                            | Weighted mode             | 5               | -0.176 | 0.282 | 3.83E-01 |

Test for horizontal pleiotropy: MR Egger intercept = 0.000269, SE = 0.00118, p = 0.834
