# Supplementary material for: Dose response of running on blood biomarkers of wellness in the generally healthy
Source: bioRxiv or medRxiv preprint supplement (doi:10.1101/2023.05.25.23290538), 2023-06-04
Supplement: Supplementary file [file media-1.pdf]

**Table 1S.** Number of people in each category by age group. Significant trend toward younger individuals reporting higher running volume, with more than 75% of the elite group falling between the ages of 18 and 35.

| <b>Age Group</b> | <b>PRO</b> | <b>HVAM</b> | <b>MVAM</b> | <b>LVAM</b> | <b>SED</b> |
|------------------|------------|-------------|-------------|-------------|------------|
| 18-35            | 53         | 434         | 1975        | 3452        | 1032       |
| 35-45            | 25         | 366         | 2537        | 3964        | 1431       |
| 45-55            | 4          | 218         | 1606        | 2469        | 1152       |
| >55              | NA         | 85          | 629         | 992         | 813        |

**Table 2S. Full running volume vs. blood biomarker results**

| Biomarker  | ANOVA p-value | Trend p-value | lowest mean | highest mean |
|------------|---------------|---------------|-------------|--------------|
| Alb        | <1e-16        | <0.001        | MVAM        | PRO          |
| ALT        | <1e-16        | <1e-16        | SED         | PRO          |
| AST        | <1e-16        | <0.001        | SED         | PRO          |
| B12        | <0.001        | <0.001        | SED         | PRO          |
| BASOS      | 0.001         | 0.004         | LVAM        | PRO          |
| BASOS_PCT  | <0.001        | 0.156         | SED         | PRO          |
| Ca         | 0.007         | 0.030         | MVAM        | PRO          |
| Chol       | <0.001        | 0.005         | PRO         | SED          |
| CK         | <1e-16        | <1e-16        | SED         | PRO          |
| Cor        | <0.001        | 0.675         | SED         | PRO          |
| D          | <1e-16        | 0.424         | SED         | PRO          |
| DHEAS      | <0.001        | <0.001        | SED         | PRO          |
| EOS        | <0.001        | 0.371         | HVAM        | SED          |
| EOS_PCT    | <0.001        | 0.137         | HVAM        | MVAM         |
| FE         | <0.001        | 0.119         | SED         | PRO          |
| Fer        | <1e-16        | <1e-16        | MVAM        | SED          |
| Fol        | <1e-16        | <0.001        | SED         | PRO          |
| FT         | <0.001        | 0.013         | SED         | PRO          |
| GGT        | <1e-16        | <0.001        | PRO         | SED          |
| Glu        | 0.087         | 0.184         | PRO         | SED          |
| Hb         | 0.002         | <0.001        | MVAM        | PRO          |
| HCT        | 0.053         | 0.055         | MVAM        | PRO          |
| HDL        | <1e-16        | <0.001        | SED         | PRO          |
| HbA1c      | <0.001        | 0.010         | PRO         | SED          |
| hsCRP      | <0.001        | 0.176         | PRO         | SED          |
| K          | <1e-16        | <0.001        | SED         | LVAM         |
| LDL        | <0.001        | 0.006         | PRO         | SED          |
| LYMPHS     | <0.001        | 0.008         | PRO         | SED          |
| LYMPHS_PCT | <1e-16        | 0.417         | SED         | PRO          |

| Biomarker | ANOVA p-value | Trend p-value | lowest mean | highest mean |
|-----------|---------------|---------------|-------------|--------------|
| MCH       | 0.197         | 0.077         | SED         | PRO          |
| MCHC      | <1e-16        | 0.276         | SED         | PRO          |
| MCV       | <0.001        | <0.001        | SED         | PRO          |
| Mg        | <0.001        | 0.276         | PRO         | SED          |
| MONOS     | <0.001        | 0.175         | PRO         | SED          |
| MONOS_PCT | <0.001        | 0.137         | SED         | LVAM         |
| MPV       | 0.058         | 0.089         | SED         | HVAM         |
| Na        | <1e-16        | 0.622         | HVAM        | SED          |
| NEUT      | <0.001        | 0.007         | PRO         | SED          |
| NEUT_PCT  | <0.001        | 0.764         | PRO         | SED          |
| PLT       | <0.001        | 0.058         | LVAM        | SED          |
| RBC       | 0.016         | 0.880         | MVAM        | SED          |
| RBC_Mg    | <0.001        | 0.773         | PRO         | SED          |
| RDW       | <1e-16        | 0.002         | PRO         | SED          |
| SHBG      | <1e-16        | 0.004         | SED         | PRO          |
| Tes       | <1e-16        | 0.675         | MVAM        | LVAM         |
| Tg        | <1e-16        | <1e-16        | PRO         | SED          |
| TIBC      | <0.001        | 0.417         | LVAM        | MVAM         |
| TS        | <1e-16        | 0.298         | SED         | PRO          |
| WBC       | <1e-16        | <1e-16        | PRO         | SED          |

**Table 3S. 2S-MR results with BMI as the exposure and select biomarkers as outcomes**

| Exposure-outcome                                                                               | Method                    | Causal estimate |        |       |          |
|------------------------------------------------------------------------------------------------|---------------------------|-----------------|--------|-------|----------|
|                                                                                                |                           | SNP             | Beta   | SE    | <i>p</i> |
| BMI-hsCRP                                                                                      | MR Egger                  | 233             | 0.440  | 0.054 | 1.74E-14 |
|                                                                                                | Weighted median           | 233             | 0.385  | 0.022 | 7.56E-71 |
|                                                                                                | Inverse variance weighted | 233             | 0.352  | 0.018 | 6.78E-84 |
|                                                                                                | Simple mode               | 233             | 0.403  | 0.067 | 8.11E-09 |
|                                                                                                | Weighted mode             | 233             | 0.413  | 0.039 | 9.98E-22 |
| Test for horizontal pleiotropy: MR Egger intercept = -0.00191, SE = 0.0109, <i>p</i> = 0.0816  |                           |                 |        |       |          |
| BMI-HbA1c                                                                                      | MR Egger                  | 213             | 0.084  | 0.042 | 4.57E-02 |
|                                                                                                | Weighted median           | 213             | 0.036  | 0.022 | 9.98E-02 |
|                                                                                                | Inverse variance weighted | 213             | 0.031  | 0.014 | 3.16E-02 |
|                                                                                                | Simple mode               | 213             | 0.021  | 0.055 | 7.07E-01 |
|                                                                                                | Weighted mode             | 213             | 0.080  | 0.036 | 2.88E-02 |
| Test for horizontal pleiotropy: MR Egger intercept = -0.00115, SE = 0.000855, <i>p</i> = 0.178 |                           |                 |        |       |          |
| BMI-Tg                                                                                         | MR Egger                  | 223             | 0.302  | 0.065 | 5.45E-06 |
|                                                                                                | Weighted median           | 223             | 0.227  | 0.029 | 5.83E-15 |
|                                                                                                | Inverse variance weighted | 223             | 0.203  | 0.022 | 6.79E-20 |
|                                                                                                | Simple mode               | 223             | 0.216  | 0.085 | 1.20E-02 |
|                                                                                                | Weighted mode             | 223             | 0.239  | 0.049 | 2.45E-06 |
| Test for horizontal pleiotropy: MR Egger intercept = -0.00220, SE = 0.00135, <i>p</i> = 0.105  |                           |                 |        |       |          |
| BMI-HDL                                                                                        | MR Egger                  | 223             | -0.341 | 0.068 | 1.13E-06 |
|                                                                                                | Weighted median           | 223             | -0.255 | 0.031 | 1.24E-16 |
|                                                                                                | Inverse variance weighted | 223             | -0.265 | 0.023 | 3.28E-30 |
|                                                                                                | Simple mode               | 223             | -0.050 | 0.074 | 5.01E-01 |
|                                                                                                | Weighted mode             | 223             | -0.285 | 0.045 | 1.73E-09 |
| Test for horizontal pleiotropy: MR Egger intercept = -0.00169, SE = 0.00141, <i>p</i> = 0.234  |                           |                 |        |       |          |
| BMI-WBC                                                                                        | MR Egger                  | 298             | -0.035 | 0.045 | 4.34E-01 |
|                                                                                                | Weighted median           | 298             | 0.031  | 0.011 | 6.15E-03 |
|                                                                                                | Inverse variance weighted | 298             | 0.019  | 0.015 | 2.23E-01 |
|                                                                                                | Simple mode               | 298             | 0.028  | 0.037 | 4.46E-01 |
|                                                                                                | Weighted mode             | 298             | 0.054  | 0.030 | 7.28E-02 |

|                                                                                              |                           |     |        |       |          |
|----------------------------------------------------------------------------------------------|---------------------------|-----|--------|-------|----------|
| Test for horizontal pleiotropy: MR Egger intercept = -0.00118, SE = 0.000921, p = 0.202      |                           |     |        |       |          |
| BMI-cortisol                                                                                 | MR Egger                  | 246 | -0.108 | 0.149 | 4.69E-01 |
|                                                                                              | Weighted median           | 246 | -0.068 | 0.075 | 3.63E-01 |
|                                                                                              | Inverse variance weighted | 246 | -0.014 | 0.049 | 7.80E-01 |
|                                                                                              | Simple mode               | 246 | -0.115 | 0.207 | 5.78E-01 |
|                                                                                              | Weighted mode             | 246 | -0.173 | 0.130 | 1.86E-01 |
| Test for horizontal pleiotropy: MR Egger intercept = -0.00202, SE = 0.00301, p = 0.503       |                           |     |        |       |          |
| BMI-SHBG                                                                                     | MR Egger                  | 492 | -6.193 | 1.182 | 2.40E-07 |
|                                                                                              | Weighted median           | 492 | -6.065 | 0.383 | 1.67E-56 |
|                                                                                              | Inverse variance weighted | 492 | -7.084 | 0.445 | 5.67E-57 |
|                                                                                              | Simple mode               | 492 | -6.315 | 1.277 | 1.06E-06 |
|                                                                                              | Weighted mode             | 492 | -5.343 | 0.777 | 1.88E-11 |
| Test for horizontal pleiotropy: MR Egger intercept = -0.0156, SE = 0.0191, p = 0.416         |                           |     |        |       |          |
| BMI-folate                                                                                   | MR Egger                  | 492 | -0.009 | 0.052 | 8.69E-01 |
|                                                                                              | Weighted median           | 492 | -0.023 | 0.029 | 4.17E-01 |
|                                                                                              | Inverse variance weighted | 492 | -0.059 | 0.019 | 2.27E-03 |
|                                                                                              | Simple mode               | 492 | -0.011 | 0.091 | 9.03E-01 |
|                                                                                              | Weighted mode             | 492 | 0.025  | 0.052 | 6.36E-01 |
| Test for horizontal pleiotropy: MR Egger intercept = -0.000891, SE = 0.000836, p = 0.288     |                           |     |        |       |          |
| BMI-RDW                                                                                      | MR Egger                  | 300 | 0.245  | 0.055 | 1.18E-05 |
|                                                                                              | Weighted median           | 300 | 0.169  | 0.021 | 1.67E-15 |
|                                                                                              | Inverse variance weighted | 300 | 0.162  | 0.019 | 1.08E-17 |
|                                                                                              | Simple mode               | 300 | 0.192  | 0.060 | 1.53E-03 |
|                                                                                              | Weighted mode             | 300 | 0.211  | 0.039 | 1.03E-07 |
| Test for horizontal pleiotropy: MR Egger intercept = -0.00184, SE = 0.001134, p = 0.107      |                           |     |        |       |          |
| BMI-Glu                                                                                      | MR Egger                  | 64  | 0.107  | 0.035 | 3.05E-03 |
|                                                                                              | Weighted median           | 64  | 0.088  | 0.019 | 5.11E-06 |
|                                                                                              | Inverse variance weighted | 64  | 0.093  | 0.015 | 3.08E-10 |
|                                                                                              | Simple mode               | 64  | 0.094  | 0.035 | 9.83E-03 |
|                                                                                              | Weighted mode             | 64  | 0.089  | 0.022 | 1.87E-04 |
| Test for horizontal pleiotropy: MR Egger intercept = -0.0003952, SE = 0.00084453, p = 0.6415 |                           |     |        |       |          |
| BMI-Fer                                                                                      | MR Egger                  | 206 | 0.008  | 0.112 | 9.41E-01 |

|                                                                                                |                           |     |        |       |          |
|------------------------------------------------------------------------------------------------|---------------------------|-----|--------|-------|----------|
|                                                                                                | Weighted median           | 206 | 0.108  | 0.057 | 5.91E-02 |
|                                                                                                | Inverse variance weighted | 206 | 0.132  | 0.039 | 6.44E-04 |
|                                                                                                | Simple mode               | 206 | 0.196  | 0.180 | 2.77E-01 |
|                                                                                                | Weighted mode             | 206 | 0.012  | 0.114 | 9.17E-01 |
| Test for horizontal pleiotropy: MR Egger intercept = 0.002695, SE = 0.002299, p = 0.242        |                           |     |        |       |          |
| BMI-Tes                                                                                        | MR Egger                  | 205 | -0.262 | 0.112 | 2.05E-02 |
|                                                                                                | Weighted median           | 205 | -0.337 | 0.060 | 1.82E-08 |
|                                                                                                | Inverse variance weighted | 205 | -0.147 | 0.041 | 3.61E-04 |
|                                                                                                | Simple mode               | 205 | -0.559 | 0.153 | 3.25E-04 |
|                                                                                                | Weighted mode             | 205 | -0.440 | 0.091 | 2.71E-06 |
| Test for horizontal pleiotropy: MR Egger intercept = 0.002656, SE = 0.002407, p = 0.271        |                           |     |        |       |          |
| BMI-Baso                                                                                       | MR Egger                  | 304 | -0.006 | 0.038 | 8.81E-01 |
|                                                                                                | Weighted median           | 304 | -0.036 | 0.018 | 4.70E-02 |
|                                                                                                | Inverse variance weighted | 304 | -0.009 | 0.013 | 4.90E-01 |
|                                                                                                | Simple mode               | 304 | -0.069 | 0.055 | 2.05E-01 |
|                                                                                                | Weighted mode             | 304 | -0.059 | 0.042 | 1.63E-01 |
| Test for horizontal pleiotropy: MR Egger intercept = -7.13E-05, SE = 0.000785, p = 0.928       |                           |     |        |       |          |
| BMI-Mono                                                                                       | MR Egger                  | 298 | -0.097 | 0.045 | 3.07E-02 |
|                                                                                                | Weighted median           | 298 | -0.015 | 0.011 | 1.82E-01 |
|                                                                                                | Inverse variance weighted | 298 | -0.018 | 0.015 | 2.37E-01 |
|                                                                                                | Simple mode               | 298 | -0.004 | 0.035 | 9.18E-01 |
|                                                                                                | Weighted mode             | 298 | -0.016 | 0.023 | 4.84E-01 |
| Test for horizontal pleiotropy: MR Egger intercept = 0.001740, SE = 0.000926404, p = 0.0613    |                           |     |        |       |          |
| BMI-MCV                                                                                        | MR Egger                  | 300 | -0.108 | 0.147 | 4.62E-01 |
|                                                                                                | Weighted median           | 300 | -0.141 | 0.079 | 7.48E-02 |
|                                                                                                | Inverse variance weighted | 300 | -0.087 | 0.049 | 7.42E-02 |
|                                                                                                | Simple mode               | 300 | -0.097 | 0.229 | 6.71E-01 |
|                                                                                                | Weighted mode             | 300 | -0.147 | 0.158 | 3.53E-01 |
| Test for horizontal pleiotropy: MR Egger intercept = 0.000459, SE = 0.003011, p = 0.879        |                           |     |        |       |          |
| BMI-Lymph                                                                                      | MR Egger                  | 298 | -0.076 | 0.048 | 1.11E-01 |
|                                                                                                | Weighted median           | 298 | -0.026 | 0.012 | 3.15E-02 |
|                                                                                                | Inverse variance weighted | 298 | 0.020  | 0.016 | 2.20E-01 |
|                                                                                                | Simple mode               | 298 | -0.028 | 0.038 | 4.64E-01 |
|                                                                                                | Weighted mode             | 298 | -0.048 | 0.022 | 3.20E-02 |
| Test for horizontal pleiotropy: MR Egger intercept = 0.002111, SE = 0.0009811, p = 0.032161341 |                           |     |        |       |          |

**Table 4S. 2S-MR results with BMI with biomarkers as exposures and BMI as outcome to assess reverse causality**

| <b>id.exposure</b>      | <b>id.outcome</b> | <b>outcome</b>                        | <b>exposure</b>                                           | <b>method</b>             | <b>nsnp</b> | <b>b</b>   | <b>se</b>  | <b>pval</b> |
|-------------------------|-------------------|---------------------------------------|-----------------------------------------------------------|---------------------------|-------------|------------|------------|-------------|
| <b>ebi-a-GCST004631</b> | ukb-a-248         | Body mass index (BMI)    id:ukb-a-248 | Basophil percentage of white cells    id:ebi-a-GCST004631 | MR Egger                  | 55          | 0.02850274 | 0.03058163 | 0.35555179  |
| <b>ebi-a-GCST004631</b> | ukb-a-248         | Body mass index (BMI)    id:ukb-a-248 | Basophil percentage of white cells    id:ebi-a-GCST004631 | Weighted median           | 55          | 0.01115946 | 0.01802141 | 0.53576264  |
| <b>ebi-a-GCST004631</b> | ukb-a-248         | Body mass index (BMI)    id:ukb-a-248 | Basophil percentage of white cells    id:ebi-a-GCST004631 | Inverse variance weighted | 55          | -0.0133255 | 0.01548404 | 0.38946137  |
| <b>ebi-a-GCST004631</b> | ukb-a-248         | Body mass index (BMI)    id:ukb-a-248 | Basophil percentage of white cells    id:ebi-a-GCST004631 | Simple mode               | 55          | 0.00553647 | 0.03733532 | 0.88266604  |
| <b>ebi-a-GCST004631</b> | ukb-a-248         | Body mass index (BMI)    id:ukb-a-248 | Basophil percentage of white cells    id:ebi-a-GCST004631 | Weighted mode             | 55          | -0.0005482 | 0.02054445 | 0.97881084  |
| <b>id.exposure</b>      | <b>id.outcome</b> | <b>outcome</b>                        | <b>exposure</b>                                           | <b>method</b>             | <b>nsnp</b> | <b>b</b>   | <b>se</b>  | <b>pval</b> |
| <b>ieu-a-1012</b>       | ukb-a-248         | Body mass index (BMI)    id:ukb-a-248 | Plasma cortisol    id:ieu-a-1012                          | Wald ratio                | 1           | -0.0162841 | 0.0285215  | 0.56803913  |
| <b>id.exposure</b>      | <b>id.outcome</b> | <b>outcome</b>                        | <b>exposure</b>                                           | <b>method</b>             | <b>nsnp</b> | <b>b</b>   | <b>se</b>  | <b>pval</b> |
| <b>ieu-a-1050</b>       | ukb-a-248         | Body mass index (BMI)    id:ukb-a-248 | Ferritin    id:ieu-a-1050                                 | MR Egger                  | 4           | -0.0692185 | 0.02954547 | 0.14388806  |
| <b>ieu-a-1050</b>       | ukb-a-248         | Body mass index (BMI)    id:ukb-a-248 | Ferritin    id:ieu-a-1050                                 | Weighted median           | 4           | -0.0458501 | 0.01819113 | 0.01171994  |
| <b>ieu-a-1050</b>       | ukb-a-248         | Body mass index (BMI)    id:ukb-a-248 | Ferritin    id:ieu-a-1050                                 | Inverse variance weighted | 4           | -0.0401901 | 0.01571805 | 0.01055975  |
| <b>ieu-a-1050</b>       | ukb-a-248         | Body mass index (BMI)    id:ukb-a-248 | Ferritin    id:ieu-a-1050                                 | Simple mode               | 4           | -0.040832  | 0.02570683 | 0.21040991  |
| <b>ieu-a-1050</b>       | ukb-a-248         | Body mass index (BMI)    id:ukb-a-248 | Ferritin    id:ieu-a-1050                                 | Weighted mode             | 4           | -0.0508659 | 0.01904314 | 0.07562034  |

| <b>id.exposure</b> | <b>id.outcome</b> | <b>outcome</b>                        | <b>exposure</b>                          | <b>method</b>             | <b>nsnp</b> | <b>b</b>   | <b>se</b> | <b>pval</b> |
|--------------------|-------------------|---------------------------------------|------------------------------------------|---------------------------|-------------|------------|-----------|-------------|
| <b>ukb-b-11349</b> | ieub-40           | body mass index    id:ieub-40         | Folate    id:ukb-b-11349                 | Wald ratio                | 1           | 0.04546597 | 0.058838  | 0.439683    |
|                    |                   |                                       |                                          |                           |             |            | 32        | 8           |
| <b>id.exposure</b> | <b>id.outcome</b> | <b>outcome</b>                        | <b>exposure</b>                          | <b>method</b>             | <b>nsnp</b> | <b>b</b>   | <b>se</b> | <b>pval</b> |
| <b>ieub-114</b>    | ukb-a-248         | Body mass index (BMI)    id:ukb-a-248 | Fasting glucose    id:ieub-114           | MR Egger                  | 30          | -0.0453952 | 0.113428  | 0.692038    |
|                    |                   |                                       |                                          |                           |             |            | 53        | 95          |
| <b>ieub-114</b>    | ukb-a-248         | Body mass index (BMI)    id:ukb-a-248 | Fasting glucose    id:ieub-114           | Weighted median           | 30          | 0.00266784 | 0.031883  | 0.933316    |
|                    |                   |                                       |                                          |                           |             |            | 98        | 16          |
| <b>ieub-114</b>    | ukb-a-248         | Body mass index (BMI)    id:ukb-a-248 | Fasting glucose    id:ieub-114           | Inverse variance weighted | 30          | -0.0341858 | 0.052964  | 0.518637    |
|                    |                   |                                       |                                          |                           |             |            | 48        | 21          |
| <b>ieub-114</b>    | ukb-a-248         | Body mass index (BMI)    id:ukb-a-248 | Fasting glucose    id:ieub-114           | Simple mode               | 30          | -0.01322   | 0.067068  | 0.845115    |
|                    |                   |                                       |                                          |                           |             |            | 73        | 55          |
| <b>ieub-114</b>    | ukb-a-248         | Body mass index (BMI)    id:ukb-a-248 | Fasting glucose    id:ieub-114           | Weighted mode             | 30          | 0.00016512 | 0.029158  | 0.995520    |
|                    |                   |                                       |                                          |                           |             |            | 44        | 48          |
| <b>id.exposure</b> | <b>id.outcome</b> | <b>outcome</b>                        | <b>exposure</b>                          | <b>method</b>             | <b>nsnp</b> | <b>b</b>   | <b>se</b> | <b>pval</b> |
| <b>ieua-270</b>    | ukb-a-248         | Body mass index (BMI)    id:ukb-a-248 | Haemoglobin concentration    id:ieua-270 | MR Egger                  | 15          | 0.00144021 | 0.07587   | 0.98514     |
|                    |                   |                                       |                                          |                           |             |            | 258       | 372         |
| <b>ieua-270</b>    | ukb-a-248         | Body mass index (BMI)    id:ukb-a-248 | Haemoglobin concentration    id:ieua-270 | Weighted median           | 15          | 0.01307681 | 0.02023   | 0.51805     |
|                    |                   |                                       |                                          |                           |             |            | 195       | 628         |
| <b>ieua-270</b>    | ukb-a-248         | Body mass index (BMI)    id:ukb-a-248 | Haemoglobin concentration    id:ieua-270 | Inverse variance weighted | 15          | -0.0334432 | 0.02660   | 0.20879     |
|                    |                   |                                       |                                          |                           |             |            | 806       | 683         |
| <b>ieua-270</b>    | ukb-a-248         | Body mass index (BMI)    id:ukb-a-248 | Haemoglobin concentration    id:ieua-270 | Simple mode               | 15          | -0.1129022 | 0.05448   | 0.05720     |
|                    |                   |                                       |                                          |                           |             |            | 673       | 502         |
| <b>ieua-270</b>    | ukb-a-248         | Body mass index (BMI)    id:ukb-a-248 | Haemoglobin concentration    id:ieua-270 | Weighted mode             | 15          | 0.01648048 | 0.02138   | 0.45363     |
|                    |                   |                                       |                                          |                           |             |            | 074       | 255         |

| id.exposure | id.outcome | outcome                               | exposure                             | method                    | nsnp | b          | se      | pval    |
|-------------|------------|---------------------------------------|--------------------------------------|---------------------------|------|------------|---------|---------|
| ieu-b-103   | ukb-a-248  | Body mass index (BMI)    id:ukb-a-248 | HbA1C    id:ieu-b-103                | MR Egger                  | 11   | 0.01268313 | 0.08396 | 0.88325 |
| ieu-b-103   | ukb-a-248  | Body mass index (BMI)    id:ukb-a-248 | HbA1C    id:ieu-b-103                | Weighted median           | 11   | -0.0069654 | 0.03248 | 0.83019 |
| ieu-b-103   | ukb-a-248  | Body mass index (BMI)    id:ukb-a-248 | HbA1C    id:ieu-b-103                | Inverse variance weighted | 11   | 0.0283815  | 0.061   | 0.41017 |
| ieu-b-103   | ukb-a-248  | Body mass index (BMI)    id:ukb-a-248 | HbA1C    id:ieu-b-103                | Simple mode               | 11   | -0.0257779 | 0.064   | 0.69075 |
| ieu-b-103   | ukb-a-248  | Body mass index (BMI)    id:ukb-a-248 | HbA1C    id:ieu-b-103                | Weighted mode             | 11   | -0.0208929 | 0.06293 | 0.60514 |
| ieu-b-103   | ukb-a-248  | Body mass index (BMI)    id:ukb-a-248 | HbA1C    id:ieu-b-103                | Weighted mode             | 11   | -0.0208929 | 0.067   | 0.756   |
| id.exposure | id.outcome | outcome                               | exposure                             | method                    | nsnp | b          | se      | pval    |
| ieu-a-275   | ukb-a-248  | Body mass index (BMI)    id:ukb-a-248 | Red blood cell count    id:ieu-a-275 | MR Egger                  | 26   | 0.26135491 | 0.14952 | 0.09326 |
| ieu-a-275   | ukb-a-248  | Body mass index (BMI)    id:ukb-a-248 | Red blood cell count    id:ieu-a-275 | Weighted median           | 26   | 0.08455861 | 0.0437  | 0.06832 |
| ieu-a-275   | ukb-a-248  | Body mass index (BMI)    id:ukb-a-248 | Red blood cell count    id:ieu-a-275 | Inverse variance weighted | 26   | -0.0072778 | 0.04638 | 0.89849 |
| ieu-a-275   | ukb-a-248  | Body mass index (BMI)    id:ukb-a-248 | Red blood cell count    id:ieu-a-275 | Simple mode               | 26   | 0.09054068 | 0.05705 | 0.26246 |
| ieu-a-275   | ukb-a-248  | Body mass index (BMI)    id:ukb-a-248 | Red blood cell count    id:ieu-a-275 | Weighted mode             | 26   | 0.09962869 | 0.04750 | 0.04626 |



| id.exposure        | id.outcome | outcome                               | exposure                                         | method                    | n SNP | b          | se             | pval           |
|--------------------|------------|---------------------------------------|--------------------------------------------------|---------------------------|-------|------------|----------------|----------------|
| ebi-a-GCST005068   | ieu-b-40   | body mass index    id:ieu-b-40        | LDL cholesterol    id:ebi-a-GCST005068           | MR Egger                  | 4     | 0.01267769 | 0.05816<br>618 | 0.84767<br>998 |
| ebi-a-GCST005068   | ieu-b-40   | body mass index    id:ieu-b-40        | LDL cholesterol    id:ebi-a-GCST005068           | Weighted median           | 4     | -0.0332107 | 0.01134<br>854 | 0.00342<br>875 |
| ebi-a-GCST005068   | ieu-b-40   | body mass index    id:ieu-b-40        | LDL cholesterol    id:ebi-a-GCST005068           | Inverse variance weighted | 4     | -0.0320938 | 0.00863<br>712 | 0.00020<br>257 |
| ebi-a-GCST005068   | ieu-b-40   | body mass index    id:ieu-b-40        | LDL cholesterol    id:ebi-a-GCST005068           | Simple mode               | 4     | -0.036639  | 0.01673<br>254 | 0.11628<br>833 |
| ebi-a-GCST005068   | ieu-b-40   | body mass index    id:ieu-b-40        | LDL cholesterol    id:ebi-a-GCST005068           | Weighted mode             | 4     | -0.034971  | 0.01482<br>963 | 0.09956<br>398 |
| id.exposure        | id.outcome | outcome                               | exposure                                         | method                    | n SNP | b          | se             | pval           |
| ebi-a-GCST90002336 | ukb-a-248  | Body mass index (BMI)    id:ukb-a-248 | Mean corpuscular volume    id:ebi-a-GCST90002336 | MR Egger                  | 9     | 0.01627788 | 0.03256<br>415 | 0.63249<br>338 |
| ebi-a-GCST90002336 | ukb-a-248  | Body mass index (BMI)    id:ukb-a-248 | Mean corpuscular volume    id:ebi-a-GCST90002336 | Weighted median           | 9     | -0.0169769 | 0.01096<br>864 | 0.12167<br>813 |
| ebi-a-GCST90002336 | ukb-a-248  | Body mass index (BMI)    id:ukb-a-248 | Mean corpuscular volume    id:ebi-a-GCST90002336 | Inverse variance weighted | 9     | -0.0212777 | 0.01246<br>612 | 0.08785<br>201 |
| ebi-a-GCST90002336 | ukb-a-248  | Body mass index (BMI)    id:ukb-a-248 | Mean corpuscular volume    id:ebi-a-GCST90002336 | Simple mode               | 9     | -0.0220168 | 0.01637<br>922 | 0.21575<br>632 |
| ebi-a-GCST90002336 | ukb-a-248  | Body mass index (BMI)    id:ukb-a-248 | Mean corpuscular volume    id:ebi-a-GCST90002336 | Weighted mode             | 9     | -0.0231087 | 0.01392<br>193 | 0.13552<br>035 |

| id.exposure | id.outcome | outcome                                  | exposure                                | method                    | nsnp | b          | se             | pval           |
|-------------|------------|------------------------------------------|-----------------------------------------|---------------------------|------|------------|----------------|----------------|
| ieu-a-1008  | ukb-a-248  | Body mass index (BMI)   <br>id:ukb-a-248 | Platelet count   <br>id:ieu-a-1008      | MR Egger                  | 32   | -0.0006727 | 0.00070<br>143 | 0.34517<br>459 |
| ieu-a-1008  | ukb-a-248  | Body mass index (BMI)   <br>id:ukb-a-248 | Platelet count   <br>id:ieu-a-1008      | Weighted median           | 32   | 0.00013472 | 0.00021<br>428 | 0.52954<br>228 |
| ieu-a-1008  | ukb-a-248  | Body mass index (BMI)   <br>id:ukb-a-248 | Platelet count   <br>id:ieu-a-1008      | Inverse variance weighted | 32   | -0.0003268 | 0.00024<br>878 | 0.18895<br>678 |
| ieu-a-1008  | ukb-a-248  | Body mass index (BMI)   <br>id:ukb-a-248 | Platelet count   <br>id:ieu-a-1008      | Simple mode               | 32   | 9.63E-05   | 0.00034<br>761 | 0.78352<br>525 |
| ieu-a-1008  | ukb-a-248  | Body mass index (BMI)   <br>id:ukb-a-248 | Platelet count   <br>id:ieu-a-1008      | Weighted mode             | 32   | 0.00011659 | 0.00024<br>456 | 0.63688<br>891 |
| id.exposure | id.outcome | outcome                                  | exposure                                | method                    | nsnp | b          | se             | pval           |
| ieu-a-275   | ukb-a-248  | Body mass index (BMI)   <br>id:ukb-a-248 | Red blood cell count<br>   id:ieu-a-275 | MR Egger                  | 26   | 0.26135491 | 0.14952<br>437 | 0.09326<br>378 |
| ieu-a-275   | ukb-a-248  | Body mass index (BMI)   <br>id:ukb-a-248 | Red blood cell count<br>   id:ieu-a-275 | Weighted median           | 26   | 0.08455861 | 0.04591<br>029 | 0.06550<br>111 |
| ieu-a-275   | ukb-a-248  | Body mass index (BMI)   <br>id:ukb-a-248 | Red blood cell count<br>   id:ieu-a-275 | Inverse variance weighted | 26   | -0.0072778 | 0.05705<br>404 | 0.89849<br>796 |
| ieu-a-275   | ukb-a-248  | Body mass index (BMI)   <br>id:ukb-a-248 | Red blood cell count<br>   id:ieu-a-275 | Simple mode               | 26   | 0.09054068 | 0.07653<br>474 | 0.24793<br>721 |
| ieu-a-275   | ukb-a-248  | Body mass index (BMI)   <br>id:ukb-a-248 | Red blood cell count<br>   id:ieu-a-275 | Weighted mode             | 26   | 0.09962869 | 0.04605<br>998 | 0.04030<br>183 |

| id.exposure      | id.outcome | outcome                               | exposure                                           | method                    | nsnp | b          | se         | pval       |
|------------------|------------|---------------------------------------|----------------------------------------------------|---------------------------|------|------------|------------|------------|
| ebi-a-GCST006804 | ukb-a-248  | Body mass index (BMI)    id:ukb-a-248 | Red cell distribution width    id:ebi-a-GCST006804 | MR Egger                  | 122  | -0.0341912 | 0.03423066 | 0.31987855 |
| ebi-a-GCST006804 | ukb-a-248  | Body mass index (BMI)    id:ukb-a-248 | Red cell distribution width    id:ebi-a-GCST006804 | Weighted median           | 122  | 0.01563428 | 0.00970492 | 0.10718764 |
| ebi-a-GCST006804 | ukb-a-248  | Body mass index (BMI)    id:ukb-a-248 | Red cell distribution width    id:ebi-a-GCST006804 | Inverse variance weighted | 122  | 0.0300081  | 0.01723486 | 0.08166104 |
| ebi-a-GCST006804 | ukb-a-248  | Body mass index (BMI)    id:ukb-a-248 | Red cell distribution width    id:ebi-a-GCST006804 | Simple mode               | 122  | 0.01857783 | 0.02026892 | 0.3611926  |
| ebi-a-GCST006804 | ukb-a-248  | Body mass index (BMI)    id:ukb-a-248 | Red cell distribution width    id:ebi-a-GCST006804 | Weighted mode             | 122  | 0.01128028 | 0.01217303 | 0.35594689 |
| id.exposure      | id.outcome | outcome                               | exposure                                           | method                    | nsnp | b          | se         | pval       |
| ieu-a-302        | ukb-a-248  | Body mass index (BMI)    id:ukb-a-248 | Triglycerides    id:ieu-a-302                      | MR Egger                  | 55   | -0.0445751 | 0.03601334 | 0.22126815 |
| ieu-a-302        | ukb-a-248  | Body mass index (BMI)    id:ukb-a-248 | Triglycerides    id:ieu-a-302                      | Weighted median           | 55   | -0.0315603 | 0.01590831 | 0.04726817 |
| ieu-a-302        | ukb-a-248  | Body mass index (BMI)    id:ukb-a-248 | Triglycerides    id:ieu-a-302                      | Inverse variance weighted | 55   | -0.0214287 | 0.02233545 | 0.33735629 |
| ieu-a-302        | ukb-a-248  | Body mass index (BMI)    id:ukb-a-248 | Triglycerides    id:ieu-a-302                      | Simple mode               | 55   | -0.0456892 | 0.02952211 | 0.1275531  |
| ieu-a-302        | ukb-a-248  | Body mass index (BMI)    id:ukb-a-248 | Triglycerides    id:ieu-a-302                      | Weighted mode             | 55   | -0.0297723 | 0.01209893 | 0.01709375 |

| id.exposure     | id.outcome | outcome                               | exposure                              | method                    | nsnp | b          | se             | pval           |
|-----------------|------------|---------------------------------------|---------------------------------------|---------------------------|------|------------|----------------|----------------|
| ieu-b-30        | ukb-a-248  | Body mass index (BMI)    id:ukb-a-248 | white blood cell count    id:ieu-b-30 | MR Egger                  | 475  | -0.0347487 | 0.02445<br>633 | 0.15602<br>056 |
| ieu-b-30        | ukb-a-248  | Body mass index (BMI)    id:ukb-a-248 | white blood cell count    id:ieu-b-30 | Weighted median           | 475  | -0.0307482 | 0.01204<br>555 | 0.01069<br>025 |
| ieu-b-30        | ukb-a-248  | Body mass index (BMI)    id:ukb-a-248 | white blood cell count    id:ieu-b-30 | Inverse variance weighted | 475  | -0.040535  | 0.01168<br>163 | 0.00052<br>05  |
| ieu-b-30        | ukb-a-248  | Body mass index (BMI)    id:ukb-a-248 | white blood cell count    id:ieu-b-30 | Simple mode               | 475  | 0.00133145 | 0.03782<br>675 | 0.97193<br>623 |
| ieu-b-30        | ukb-a-248  | Body mass index (BMI)    id:ukb-a-248 | white blood cell count    id:ieu-b-30 | Weighted mode             | 475  | -0.0184754 | 0.02085<br>621 | 0.37614<br>876 |
| id.exposure     | id.outcome | outcome                               | exposure                              | method                    | nsnp | b          | se             | pval           |
| ukb-d-30830_raw | ieu-b-40   | body mass index    id:ieu-b-40        | SHBG    id:ukb-d-30830_raw            | MR Egger                  | 135  | 0.00121356 | 0.00180<br>979 | 0.50366<br>715 |
| ukb-d-30830_raw | ieu-b-40   | body mass index    id:ieu-b-40        | SHBG    id:ukb-d-30830_raw            | Weighted median           | 135  | 0.00102542 | 0.00037<br>386 | 0.00609<br>279 |
| ukb-d-30830_raw | ieu-b-40   | body mass index    id:ieu-b-40        | SHBG    id:ukb-d-30830_raw            | Inverse variance weighted | 135  | -0.002129  | 0.00115<br>3   | 0.06482<br>013 |
| ukb-d-30830_raw | ieu-b-40   | body mass index    id:ieu-b-40        | SHBG    id:ukb-d-30830_raw            | Simple mode               | 135  | -0.0011256 | 0.00124<br>723 | 0.36841<br>147 |

**Table 5S. 2S-MR results with vigorous physical activity as exposure and blood biomarkers as outcomes**

| id.exposure      | id.outcome       | outcome                                | exposure                                          | method                    | nsnp | b          | se       | pval     |
|------------------|------------------|----------------------------------------|---------------------------------------------------|---------------------------|------|------------|----------|----------|
| ebi-a-GCST006098 | ebi-a-GCST005068 | LDL cholesterol    id:ebi-a-GCST005068 | Vigorous physical activity    id:ebi-a-GCST006098 | MR Egger                  | 7    | 4.55735741 | 5.397582 | 0.437005 |
|                  |                  |                                        |                                                   |                           |      |            | 61       | 89       |
| ebi-a-GCST006098 | ebi-a-GCST005068 | LDL cholesterol    id:ebi-a-GCST005068 | Vigorous physical activity    id:ebi-a-GCST006098 | Weighted median           | 7    | -0.6208293 | 0.838434 | 0.459019 |
|                  |                  |                                        |                                                   |                           |      |            | 47       | 39       |
| ebi-a-GCST006098 | ebi-a-GCST005068 | LDL cholesterol    id:ebi-a-GCST005068 | Vigorous physical activity    id:ebi-a-GCST006098 | Inverse variance weighted | 7    | -0.2426177 | 0.660161 | 0.713236 |
|                  |                  |                                        |                                                   |                           |      |            | 46       | 61       |
| ebi-a-GCST006098 | ebi-a-GCST005068 | LDL cholesterol    id:ebi-a-GCST005068 | Vigorous physical activity    id:ebi-a-GCST006098 | Simple mode               | 7    | -1.231375  | 1.532513 | 0.452333 |
|                  |                  |                                        |                                                   |                           |      |            | 13       | 86       |
| ebi-a-GCST006098 | ebi-a-GCST005068 | LDL cholesterol    id:ebi-a-GCST005068 | Vigorous physical activity    id:ebi-a-GCST006098 | Weighted mode             | 7    | -1.0821029 | 1.017395 | 0.328430 |
|                  |                  |                                        |                                                   |                           |      |            | 34       | 07       |
| ebi-a-GCST006098 | ieu-a-1050       | Ferritin    id:ieu-a-1050              | Vigorous physical activity    id:ebi-a-GCST006098 | MR Egger                  | 5    | -5.2248204 | 5.495151 | 0.411848 |
|                  |                  |                                        |                                                   |                           |      |            | 03       | 23       |
| ebi-a-GCST006098 | ieu-a-1050       | Ferritin    id:ieu-a-1050              | Vigorous physical activity    id:ebi-a-GCST006098 | Weighted median           | 5    | -0.7040971 | 0.647521 | 0.276872 |
|                  |                  |                                        |                                                   |                           |      |            | 49       | 22       |
| ebi-a-GCST006098 | ieu-a-1050       | Ferritin    id:ieu-a-1050              | Vigorous physical activity    id:ebi-a-GCST006098 | Inverse variance weighted | 5    | -0.1408587 | 0.767230 | 0.854332 |
|                  |                  |                                        |                                                   |                           |      |            | 61       | 25       |
| ebi-a-GCST006098 | ieu-a-1050       | Ferritin    id:ieu-a-1050              | Vigorous physical activity    id:ebi-a-GCST006098 | Simple mode               | 5    | -0.8515134 | 0.843286 | 0.369732 |
|                  |                  |                                        |                                                   |                           |      |            | 04       | 73       |
| ebi-a-GCST006098 | ieu-a-1050       | Ferritin    id:ieu-a-1050              | Vigorous physical activity    id:ebi-a-GCST006098 | Weighted mode             | 5    | -0.9327437 | 0.769158 | 0.291972 |
|                  |                  |                                        |                                                   |                           |      |            | 52       | 96       |
| ebi-a-GCST006098 | ieu-a-302        | Triglycerides    id:ieu-a-302          | Vigorous physical activity    id:ebi-a-GCST006098 | MR Egger                  | 5    | -1.4775783 | 1.334354 | 0.348955 |
|                  |                  |                                        |                                                   |                           |      |            | 04       | 32       |
| ebi-a-GCST006098 | ieu-a-302        | Triglycerides    id:ieu-a-302          | Vigorous physical activity    id:ebi-a-GCST006098 | Weighted median           | 5    | -0.1485007 | 0.262002 | 0.570856 |
|                  |                  |                                        |                                                   |                           |      |            | 58       | 3        |
| ebi-a-GCST006098 | ieu-a-302        | Triglycerides    id:ieu-a-302          | Vigorous physical activity    id:ebi-a-GCST006098 | Inverse variance weighted | 5    | -0.0745059 | 0.221142 | 0.736182 |
|                  |                  |                                        |                                                   |                           |      |            | 62       | 24       |
| ebi-a-GCST006098 | ieu-a-302        | Triglycerides    id:ieu-a-302          | Vigorous physical activity    id:ebi-a-GCST006098 | Simple mode               | 5    | -0.1338663 | 0.368514 | 0.734794 |
|                  |                  |                                        |                                                   |                           |      |            | 73       | 89       |
| ebi-a-GCST006098 | ieu-a-302        | Triglycerides    id:ieu-a-302          | Vigorous physical activity    id:ebi-a-GCST006098 | Weighted mode             | 5    | -0.1563444 | 0.328858 | 0.659289 |
|                  |                  |                                        |                                                   |                           |      |            | 88       | 19       |
| ebi-a-GCST006098 | ukb-b-11349      | Folate    id:ukb-b-11349               | Vigorous physical activity    id:ebi-a-GCST006098 | MR Egger                  | 7    | 0.44992252 | 2.058173 | 0.835602 |
|                  |                  |                                        |                                                   |                           |      |            | 78       | 06       |
| ebi-a-GCST006098 | ukb-b-11349      | Folate    id:ukb-b-11349               | Vigorous physical activity    id:ebi-a-GCST006098 | Weighted median           | 7    | -0.2016639 | 0.320053 | 0.528633 |
|                  |                  |                                        |                                                   |                           |      |            | 64       | 09       |
| ebi-a-GCST006098 | ukb-b-11349      | Folate    id:ukb-b-11349               | Vigorous physical activity    id:ebi-a-GCST006098 | Inverse variance weighted | 7    | -0.2577298 | 0.244615 | 0.292060 |
|                  |                  |                                        |                                                   |                           |      |            | 28       | 17       |
| ebi-a-GCST006098 | ukb-b-11349      | Folate    id:ukb-b-11349               | Vigorous physical activity    id:ebi-a-GCST006098 | Simple mode               | 7    | 0.0568742  | 0.467024 | 0.907049 |
|                  |                  |                                        |                                                   |                           |      |            | 35       | 56       |
| ebi-a-GCST006098 | ukb-b-11349      | Folate    id:ukb-b-11349               | Vigorous physical activity    id:ebi-a-GCST006098 | Weighted mode             | 7    | 0.07601041 | 0.465339 | 0.875610 |
|                  |                  |                                        |                                                   |                           |      |            | 68       | 65       |

| ebi-a-GCST006098 | ukb-d-30070_irnt | Red blood cell (erythrocyte) distribution width    id:ukb-d-30070_irnt | Vigorous physical activity    id:ebi-a-GCST006098 | MR Egger                  | 7 | 1.57820562 | 1.795700<br>92 | 0.419691<br>32 |
|------------------|------------------|------------------------------------------------------------------------|---------------------------------------------------|---------------------------|---|------------|----------------|----------------|
| ebi-a-GCST006098 | ukb-d-30070_irnt | Red blood cell (erythrocyte) distribution width    id:ukb-d-30070_irnt | Vigorous physical activity    id:ebi-a-GCST006098 | Weighted median           | 7 | -0.0549663 | 0.143906<br>26 | 0.702491<br>75 |
| ebi-a-GCST006098 | ukb-d-30070_irnt | Red blood cell (erythrocyte) distribution width    id:ukb-d-30070_irnt | Vigorous physical activity    id:ebi-a-GCST006098 | Inverse variance weighted | 7 | -0.2321729 | 0.213298<br>82 | 0.276380<br>26 |
| ebi-a-GCST006098 | ukb-d-30070_irnt | Red blood cell (erythrocyte) distribution width    id:ukb-d-30070_irnt | Vigorous physical activity    id:ebi-a-GCST006098 | Simple mode               | 7 | -0.0408618 | 0.177334<br>68 | 0.825419<br>27 |
| ebi-a-GCST006098 | ukb-d-30070_irnt | Red blood cell (erythrocyte) distribution width    id:ukb-d-30070_irnt | Vigorous physical activity    id:ebi-a-GCST006098 | Weighted mode             | 7 | -0.0920344 | 0.182147<br>56 | 0.631385<br>89 |
| ebi-a-GCST006098 | ukb-d-30830_irnt | SHBG    id:ukb-d-30830_irnt                                            | Vigorous physical activity    id:ebi-a-GCST006098 | MR Egger                  | 7 | 0.46503747 | 1.973712<br>9  | 0.823077<br>52 |
| ebi-a-GCST006098 | ukb-d-30830_irnt | SHBG    id:ukb-d-30830_irnt                                            | Vigorous physical activity    id:ebi-a-GCST006098 | Weighted median           | 7 | 0.11870029 | 0.151914<br>89 | 0.434590<br>52 |
| ebi-a-GCST006098 | ukb-d-30830_irnt | SHBG    id:ukb-d-30830_irnt                                            | Vigorous physical activity    id:ebi-a-GCST006098 | Inverse variance weighted | 7 | 0.33282495 | 0.213695<br>39 | 0.119358<br>06 |
| ebi-a-GCST006098 | ukb-d-30830_irnt | SHBG    id:ukb-d-30830_irnt                                            | Vigorous physical activity    id:ebi-a-GCST006098 | Simple mode               | 7 | 0.07719013 | 0.190096<br>22 | 0.698784<br>8  |
| ebi-a-GCST006098 | ukb-d-30830_irnt | SHBG    id:ukb-d-30830_irnt                                            | Vigorous physical activity    id:ebi-a-GCST006098 | Weighted mode             | 7 | 0.08827653 | 0.182289<br>32 | 0.645365<br>99 |

### Tests for horizontal pleiotropy

| id.exposure      | id.outcome       | outcome                                                                | exposure                                          | Egger intercept | se             | pval           |
|------------------|------------------|------------------------------------------------------------------------|---------------------------------------------------|-----------------|----------------|----------------|
| ebi-a-GCST006098 | ebi-a-GCST005068 | LDL cholesterol    id:ebi-a-GCST005068                                 | Vigorous physical activity    id:ebi-a-GCST006098 | -0.0463331      | 0.051710<br>55 | 0.411305<br>82 |
| ebi-a-GCST006098 | ieu-a-1050       | Ferritin    id:ieu-a-1050                                              | Vigorous physical activity    id:ebi-a-GCST006098 | 0.04824757      | 0.051622<br>26 | 0.418926<br>33 |
| ebi-a-GCST006098 | ieu-a-302        | Triglycerides    id:ieu-a-302                                          | Vigorous physical activity    id:ebi-a-GCST006098 | 0.01391277      | 0.013048<br>39 | 0.364507<br>21 |
| ebi-a-GCST006098 | ukb-b-11349      | Folate    id:ukb-b-11349                                               | Vigorous physical activity    id:ebi-a-GCST006098 | -0.0065813      | 0.019005<br>84 | 0.743228<br>24 |
| ebi-a-GCST006098 | ukb-d-30070_irnt | Red blood cell (erythrocyte) distribution width    id:ukb-d-30070_irnt | Vigorous physical activity    id:ebi-a-GCST006098 | -0.0168346      | 0.016580<br>53 | 0.356535<br>74 |
| ebi-a-GCST006098 | ukb-d-30830_irnt | SHBG    id:ukb-d-30830_irnt                                            | Vigorous physical activity    id:ebi-a-GCST006098 | -0.0012295      | 0.018225<br>48 | 0.948828<br>18 |

**Table 6S. 2S-MR results with vigorous physical activity as exposure and blood biomarkers as outcomes**

| id.exposure      | id.outcome  | outcome                                                     | exposure                                          | method                    | nsn |           |            | pval          |
|------------------|-------------|-------------------------------------------------------------|---------------------------------------------------|---------------------------|-----|-----------|------------|---------------|
|                  |             |                                                             |                                                   |                           | p   | b         | se         |               |
| ebi-a-GCST006098 | ukb-b-10217 | Sweets intake    id:ukb-b-10217                             | Vigorous physical activity    id:ebi-a-GCST006098 | MR Egger                  | 7   | 0.0903539 | 1.5078935  | 0.95454011    |
| ebi-a-GCST006098 | ukb-b-10217 | Sweets intake    id:ukb-b-10217                             | Vigorous physical activity    id:ebi-a-GCST006098 | Weighted median           | 7   | 0.2367422 | 0.21224606 | 0.26467304    |
| ebi-a-GCST006098 | ukb-b-10217 | Sweets intake    id:ukb-b-10217                             | Vigorous physical activity    id:ebi-a-GCST006098 | Inverse variance weighted | 7   | 0.1760505 | 0.17921106 | 0.32592043    |
| ebi-a-GCST006098 | ukb-b-10217 | Sweets intake    id:ukb-b-10217                             | Vigorous physical activity    id:ebi-a-GCST006098 | Simple mode               | 7   | 0.2770321 | 0.31802813 | 0.41719033    |
| ebi-a-GCST006098 | ukb-b-10217 | Sweets intake    id:ukb-b-10217                             | Vigorous physical activity    id:ebi-a-GCST006098 | Weighted mode             | 7   | 0.2596458 | 0.31161898 | 0.43662814    |
| ebi-a-GCST006098 | ukb-b-11679 | Type of special diet followed: Vegetarian    id:ukb-b-11679 | Vigorous physical activity    id:ebi-a-GCST006098 | MR Egger                  | 6   |           | 0.30989332 | 0.88272515054 |
| ebi-a-GCST006098 | ukb-b-11679 | Type of special diet followed: Vegetarian    id:ukb-b-11679 | Vigorous physical activity    id:ebi-a-GCST006098 | Weighted median           | 6   |           | 0.02203046 | 0.0642637884  |
| ebi-a-GCST006098 | ukb-b-11679 | Type of special diet followed: Vegetarian    id:ukb-b-11679 | Vigorous physical activity    id:ebi-a-GCST006098 | Inverse variance weighted | 6   |           | 0.02308089 | 0.04874316178 |
| ebi-a-GCST006098 | ukb-b-11679 | Type of special diet followed: Vegetarian    id:ukb-b-11679 | Vigorous physical activity    id:ebi-a-GCST006098 | Simple mode               | 6   |           | 0.02147452 | 0.10369298404 |
| ebi-a-GCST006098 | ukb-b-11679 | Type of special diet followed: Vegetarian    id:ukb-b-11679 | Vigorous physical activity    id:ebi-a-GCST006098 | Weighted mode             | 6   |           | 0.02451679 | 0.09506696012 |
| ebi-a-GCST006098 | ukb-b-1996  | Salad / raw vegetable intake    id:ukb-b-1996               | Vigorous physical activity    id:ebi-a-GCST006098 | MR Egger                  | 7   |           | 0.66619702 | 1.2339482007  |
| ebi-a-GCST006098 | ukb-b-1996  | Salad / raw vegetable intake    id:ukb-b-1996               | Vigorous physical activity    id:ebi-a-GCST006098 | Weighted median           | 7   | 0.5139604 | 0.10299379 | 6.03E-07      |
| ebi-a-GCST006098 | ukb-b-1996  | Salad / raw vegetable intake    id:ukb-b-1996               | Vigorous physical activity    id:ebi-a-GCST006098 | Inverse variance weighted | 7   | 0.5044851 | 0.13388668 | 0.00016456    |
| ebi-a-GCST006098 | ukb-b-1996  | Salad / raw vegetable intake    id:ukb-b-1996               | Vigorous physical activity    id:ebi-a-GCST006098 | Simple mode               | 7   | 0.6270295 | 0.14130406 | 0.00438784    |

|                         |                   |                                                      |                                                          |                           |          |                   |                  |                   |
|-------------------------|-------------------|------------------------------------------------------|----------------------------------------------------------|---------------------------|----------|-------------------|------------------|-------------------|
| <b>ebi-a-GCST006098</b> | <b>ukb-b-1996</b> | <b>Salad / raw vegetable intake    id:ukb-b-1996</b> | <b>Vigorous physical activity    id:ebi-a-GCST006098</b> | <b>Weighted mode</b>      | <b>7</b> | <b>0.58940834</b> | <b>0.1467562</b> | <b>0.00698862</b> |
| <b>ebi-a-GCST006098</b> | ukb-b-2209        | Oily fish intake    id:ukb-b-2209                    | Vigorous physical activity    id:ebi-a-GCST006098        | MR Egger                  | 7        | 0.95472369        | 2.00996591       | 0.65481403        |
| <b>ebi-a-GCST006098</b> | ukb-b-2209        | Oily fish intake    id:ukb-b-2209                    | Vigorous physical activity    id:ebi-a-GCST006098        | Weighted median           | 7        | 0.53975424        | 0.15310124       | 0.00042273        |
| <b>ebi-a-GCST006098</b> | ukb-b-2209        | Oily fish intake    id:ukb-b-2209                    | Vigorous physical activity    id:ebi-a-GCST006098        | Inverse variance weighted | 7        | 0.48170818        | 0.21898245       | 0.02782414        |
| <b>ebi-a-GCST006098</b> | ukb-b-2209        | Oily fish intake    id:ukb-b-2209                    | Vigorous physical activity    id:ebi-a-GCST006098        | Simple mode               | 7        | 0.82403974        | 0.20581323       | 0.00708805        |
| <b>ebi-a-GCST006098</b> | ukb-b-2209        | Oily fish intake    id:ukb-b-2209                    | Vigorous physical activity    id:ebi-a-GCST006098        | Weighted mode             | 7        | 0.78663663        | 0.29210032       | 0.03590724        |
| <b>ebi-a-GCST006098</b> | ukb-b-3881        | Fresh fruit intake    id:ukb-b-3881                  | Vigorous physical activity    id:ebi-a-GCST006098        | MR Egger                  | 7        | 1.30879467        | 1.11224869       | 0.29227451        |
| <b>ebi-a-GCST006098</b> | ukb-b-3881        | Fresh fruit intake    id:ukb-b-3881                  | Vigorous physical activity    id:ebi-a-GCST006098        | Weighted median           | 7        | 0.46001672        | 0.08901784       | 2.37E-07          |
| <b>ebi-a-GCST006098</b> | ukb-b-3881        | Fresh fruit intake    id:ukb-b-3881                  | Vigorous physical activity    id:ebi-a-GCST006098        | Inverse variance weighted | 7        | 0.38633487        | 0.12863774       | 0.00267088        |
| <b>ebi-a-GCST006098</b> | ukb-b-3881        | Fresh fruit intake    id:ukb-b-3881                  | Vigorous physical activity    id:ebi-a-GCST006098        | Simple mode               | 7        | 0.59733916        | 0.1169325        | 0.00220313        |
| <b>ebi-a-GCST006098</b> | ukb-b-3881        | Fresh fruit intake    id:ukb-b-3881                  | Vigorous physical activity    id:ebi-a-GCST006098        | Weighted mode             | 7        | 0.58037912        | 0.12022717       | 0.00291812        |
| <b>ebi-a-GCST006098</b> | ukb-b-4616        | Nap during day    id:ukb-b-4616                      | Vigorous physical activity    id:ebi-a-GCST006098        | MR Egger                  | 7        | -1.8168346        | 0.8575858        | 0.08766702        |



|                         |                   |                                        |                                                          |                           |          |                   |                |                |
|-------------------------|-------------------|----------------------------------------|----------------------------------------------------------|---------------------------|----------|-------------------|----------------|----------------|
| <b>ebi-a-GCST006098</b> | <b>ukb-b-4616</b> | <b>Nap during day    id:ukb-b-4616</b> | <b>Vigorous physical activity    id:ebi-a-GCST006098</b> | <b>Weighted median</b>    | <b>7</b> | <b>-0.3203349</b> | <b>0.09563</b> | <b>0.00080</b> |
|                         |                   |                                        |                                                          |                           |          |                   | <b>435</b>     | <b>934</b>     |
| <b>ebi-a-GCST006098</b> | ukb-b-4616        | Nap during day    id:ukb-b-4616        | Vigorous physical activity    id:ebi-a-GCST006098        | Inverse variance weighted | 7        | -0.1836272        | 0.12240        | 0.13356        |
|                         |                   |                                        |                                                          |                           |          |                   | 112            | 03             |
| <b>ebi-a-GCST006098</b> | ukb-b-4616        | Nap during day    id:ukb-b-4616        | Vigorous physical activity    id:ebi-a-GCST006098        | Simple mode               | 7        | -0.3872459        | 0.12727        | 0.02272        |
|                         |                   |                                        |                                                          |                           |          |                   | 48             | 693            |
| <b>ebi-a-GCST006098</b> | ukb-b-4616        | Nap during day    id:ukb-b-4616        | Vigorous physical activity    id:ebi-a-GCST006098        | Weighted mode             | 7        | -0.3872459        | 0.11249        | 0.01375        |
|                         |                   |                                        |                                                          |                           |          |                   | 117            | 948            |
| <b>ebi-a-GCST006098</b> | ukb-b-6324        | Processed meat intake    id:ukb-b-6324 | Vigorous physical activity    id:ebi-a-GCST006098        | MR Egger                  | 7        | 0.06859678        | 1.00946        | 0.94845        |
|                         |                   |                                        |                                                          |                           |          |                   | 468            | 629            |
| <b>ebi-a-GCST006098</b> | ukb-b-6324        | Processed meat intake    id:ukb-b-6324 | Vigorous physical activity    id:ebi-a-GCST006098        | Weighted median           | 7        | -0.6292381        | 0.13853        | 5.57E-         |
|                         |                   |                                        |                                                          |                           |          |                   | 861            | 06             |
| <b>ebi-a-GCST006098</b> | ukb-b-6324        | Processed meat intake    id:ukb-b-6324 | Vigorous physical activity    id:ebi-a-GCST006098        | Inverse variance weighted | 7        | -0.5496216        | 0.11346        | 1.27E-         |
|                         |                   |                                        |                                                          |                           |          |                   | 205            | 06             |
| <b>ebi-a-GCST006098</b> | ukb-b-6324        | Processed meat intake    id:ukb-b-6324 | Vigorous physical activity    id:ebi-a-GCST006098        | Simple mode               | 7        | -0.6879646        | 0.21816        | 0.01972        |
|                         |                   |                                        |                                                          |                           |          |                   | 478            | 901            |
| <b>ebi-a-GCST006098</b> | ukb-b-6324        | Processed meat intake    id:ukb-b-6324 | Vigorous physical activity    id:ebi-a-GCST006098        | Weighted mode             | 7        | -0.6939066        | 0.21655        | 0.01850        |
|                         |                   |                                        |                                                          |                           |          |                   | 974            | 116            |

Tests for horizontal pleiotropy

| id.exposure      | id.outcome  | outcome                                                     | exposure                                          | Egger intercept | se             | pval           |
|------------------|-------------|-------------------------------------------------------------|---------------------------------------------------|-----------------|----------------|----------------|
| ebi-a-GCST006098 | ukb-b-10217 | Sweets intake    id:ukb-b-10217                             | Vigorous physical activity    id:ebi-a-GCST006098 | -0.000797       | 0.01392<br>445 | 0.95657<br>282 |
| ebi-a-GCST006098 | ukb-b-11679 | Type of special diet followed: Vegetarian    id:ukb-b-11679 | Vigorous physical activity    id:ebi-a-GCST006098 | -0.0025594      | 0.00786<br>299 | 0.76112<br>246 |
| ebi-a-GCST006098 | ukb-b-1996  | Salad / raw vegetable intake    id:ukb-b-1996               | Vigorous physical activity    id:ebi-a-GCST006098 | -0.0015039      | 0.01139<br>436 | 0.90014<br>308 |
| ebi-a-GCST006098 | ukb-b-2209  | Oily fish intake    id:ukb-b-2209                           | Vigorous physical activity    id:ebi-a-GCST006098 | -0.0043991      | 0.01856<br>093 | 0.82205<br>339 |
| ebi-a-GCST006098 | ukb-b-3881  | Fresh fruit intake    id:ukb-b-3881                         | Vigorous physical activity    id:ebi-a-GCST006098 | -0.0085789      | 0.01027<br>085 | 0.44163<br>822 |
| ebi-a-GCST006098 | ukb-b-4616  | Nap during day    id:ukb-b-4616                             | Vigorous physical activity    id:ebi-a-GCST006098 | 0.01518897      | 0.00791<br>926 | 0.11322<br>178 |
| ebi-a-GCST006098 | ukb-b-6324  | Processed meat intake    id:ukb-b-6324                      | Vigorous physical activity    id:ebi-a-GCST006098 | -0.0057496      | 0.00932<br>2   | 0.56437<br>631 |

**Table 7S. 2S-MR with healthy/unhealthy dietary habits as exposures and vigorous physical activity as outcome to assess reverse causality**

| id.exposure | id.outcome | outcome                    | exposure                            | method                    | nsn |           | se           | pval    |
|-------------|------------|----------------------------|-------------------------------------|---------------------------|-----|-----------|--------------|---------|
|             |            |                            |                                     |                           | p   | b         |              |         |
| ukb-b-1996  | ebi-a-     | Vigorous physical activity | Salad / raw vegetable intake        |                           | 2   |           |              | 0.26681 |
|             | GCST006098 | id:ebi-a-GCST006098        | id:ukb-b-1996                       | MR Egger                  | 0   | 0.3848011 | 0.33578299   | 018     |
| ukb-b-1996  | ebi-a-     | Vigorous physical activity | Salad / raw vegetable intake        |                           | 2   | 0.2725700 |              | 7.19E-  |
|             | GCST006098 | id:ebi-a-GCST006098        | id:ukb-b-1996                       | Weighted median           | 0   |           | 2 0.06073408 | 06      |
| ukb-b-1996  | ebi-a-     | Vigorous physical activity | Salad / raw vegetable intake        |                           | 2   | 0.3160797 |              | 1.50E-  |
|             | GCST006098 | id:ebi-a-GCST006098        | id:ukb-b-1996                       | Inverse variance weighted | 0   |           | 5 0.0657002  | 06      |
| ukb-b-1996  | ebi-a-     | Vigorous physical activity | Salad / raw vegetable intake        |                           | 2   | 0.3937231 |              | 0.01570 |
|             | GCST006098 | id:ebi-a-GCST006098        | id:ukb-b-1996                       | Simple mode               | 0   |           | 5 0.14841231 | 282     |
| ukb-b-1996  | ebi-a-     | Vigorous physical activity | Salad / raw vegetable intake        |                           | 2   | 0.3979305 |              | 0.02773 |
|             | GCST006098 | id:ebi-a-GCST006098        | id:ukb-b-1996                       | Weighted mode             | 0   |           | 4 0.16695029 | 826     |
| ukb-b-6324  | ebi-a-     | Vigorous physical activity | Processed meat intake    id:ukb-b-  |                           | 2   | 0.1350953 |              | 0.44748 |
|             | GCST006098 | id:ebi-a-GCST006098        | 6324                                | MR Egger                  | 3   |           | 3 0.17451244 | 219     |
| ukb-b-6324  | ebi-a-     | Vigorous physical activity | Processed meat intake    id:ukb-b-  |                           | 2   |           |              | 0.04105 |
|             | GCST006098 | id:ebi-a-GCST006098        | 6324                                | Weighted median           | 3   | 0.0754533 | 0.03693307   | 493     |
| ukb-b-6324  | ebi-a-     | Vigorous physical activity | Processed meat intake    id:ukb-b-  |                           | 2   |           |              | 0.00366 |
|             | GCST006098 | id:ebi-a-GCST006098        | 6324                                | Inverse variance weighted | 3   | 0.1085666 | 0.03736846   | 899     |
| ukb-b-6324  | ebi-a-     | Vigorous physical activity | Processed meat intake    id:ukb-b-  |                           | 2   |           |              | 0.51295 |
|             | GCST006098 | id:ebi-a-GCST006098        | 6324                                | Simple mode               | 3   | 0.0569462 | 0.08563101   | 016     |
| ukb-b-6324  | ebi-a-     | Vigorous physical activity | Processed meat intake    id:ukb-b-  |                           | 2   |           |              | 0.64000 |
|             | GCST006098 | id:ebi-a-GCST006098        | 6324                                | Weighted mode             | 3   | 0.0357803 | 0.07544894   | 771     |
| ukb-b-4616  | ebi-a-     | Vigorous physical activity |                                     |                           | 8   |           |              | 0.15504 |
|             | GCST006098 | id:ebi-a-GCST006098        | Nap during day    id:ukb-b-4616     | MR Egger                  | 9   | 0.1310942 | 0.09139345   | 488     |
| ukb-b-4616  | ebi-a-     | Vigorous physical activity |                                     |                           | 8   |           |              | 0.05443 |
|             | GCST006098 | id:ebi-a-GCST006098        | Nap during day    id:ukb-b-4616     | Weighted median           | 9   | 0.0537114 | 0.0279262    | 828     |
| ukb-b-4616  | ebi-a-     | Vigorous physical activity |                                     |                           | 8   |           |              | 0.00877 |
|             | GCST006098 | id:ebi-a-GCST006098        | Nap during day    id:ukb-b-4616     | Inverse variance weighted | 9   | 0.0652623 | 0.02490192   | 309     |
| ukb-b-4616  | ebi-a-     | Vigorous physical activity |                                     |                           | 8   |           |              | 0.33792 |
|             | GCST006098 | id:ebi-a-GCST006098        | Nap during day    id:ukb-b-4616     | Simple mode               | 9   | 0.0625663 | 0.0649349    | 525     |
| ukb-b-4616  | ebi-a-     | Vigorous physical activity |                                     |                           | 8   |           |              | 0.38264 |
|             | GCST006098 | id:ebi-a-GCST006098        | Nap during day    id:ukb-b-4616     | Weighted mode             | 9   | 0.0482764 | 0.05502095   | 819     |
| ukb-b-3881  | ebi-a-     | Vigorous physical activity |                                     |                           | 5   |           |              | 0.82694 |
|             | GCST006098 | id:ebi-a-GCST006098        | Fresh fruit intake    id:ukb-b-3881 | MR Egger                  | 3   | 0.0277245 | 0.12616196   | 037     |

|                   |                         |                                      |                              |                           |           |                   |           |                |                 |
|-------------------|-------------------------|--------------------------------------|------------------------------|---------------------------|-----------|-------------------|-----------|----------------|-----------------|
| <b>ukb-b-3881</b> | <b>ebi-a-GCST006098</b> | <b>Vigorous physical activity   </b> | <b>Fresh fruit intake   </b> | <b>Weighted median</b>    | <b>53</b> | <b>0.16136177</b> | <b>63</b> | <b>0.03846</b> | <b>2.73E-05</b> |
| <b>ukb-b-3881</b> | ebi-a-GCST006098        | Vigorous physical activity           | Fresh fruit intake           | Inverse variance weighted | 53        | 0.2103584         | 867       | 0.03697        | 1.28E-08        |
| <b>ukb-b-3881</b> | ebi-a-GCST006098        | Vigorous physical activity           | Fresh fruit intake           | Simple mode               | 53        | 0.16760638        | 947       | 0.09363        | 0.07929         |
| <b>ukb-b-3881</b> | ebi-a-GCST006098        | Vigorous physical activity           | Fresh fruit intake           | Weighted mode             | 53        | 0.14738639        | 063       | 0.08743        | 0.09783         |

### Tests for horizontal pleiotropy

| <b>id.exposure</b> | <b>id.outcome</b> | <b>outcome</b>             | <b>exposure</b>                               | <b>Egger intercept</b> | <b>se</b>  | <b>pval</b> |
|--------------------|-------------------|----------------------------|-----------------------------------------------|------------------------|------------|-------------|
| <b>ukb-b-1996</b>  | ebi-a-GCST006098  | Vigorous physical activity | Salad / raw vegetable intake    id:ukb-b-1996 | -0.0007564             | 0.00362056 | 0.83686113  |
| <b>ukb-b-6324</b>  | ebi-a-GCST006098  | Vigorous physical activity | Processed meat intake    id:ukb-b-6324        | -0.0037415             | 0.00262036 | 0.16803755  |
| <b>ukb-b-4616</b>  | ebi-a-GCST006098  | Vigorous physical activity | Nap during day    id:ukb-b-4616               | 0.00064846             | 0.00086601 | 0.45600425  |
| <b>ukb-b-3881</b>  | ebi-a-GCST006098  | Vigorous physical activity | Fresh fruit intake    id:ukb-b-3881           | 0.00227091             | 0.00115335 | 0.05440223  |

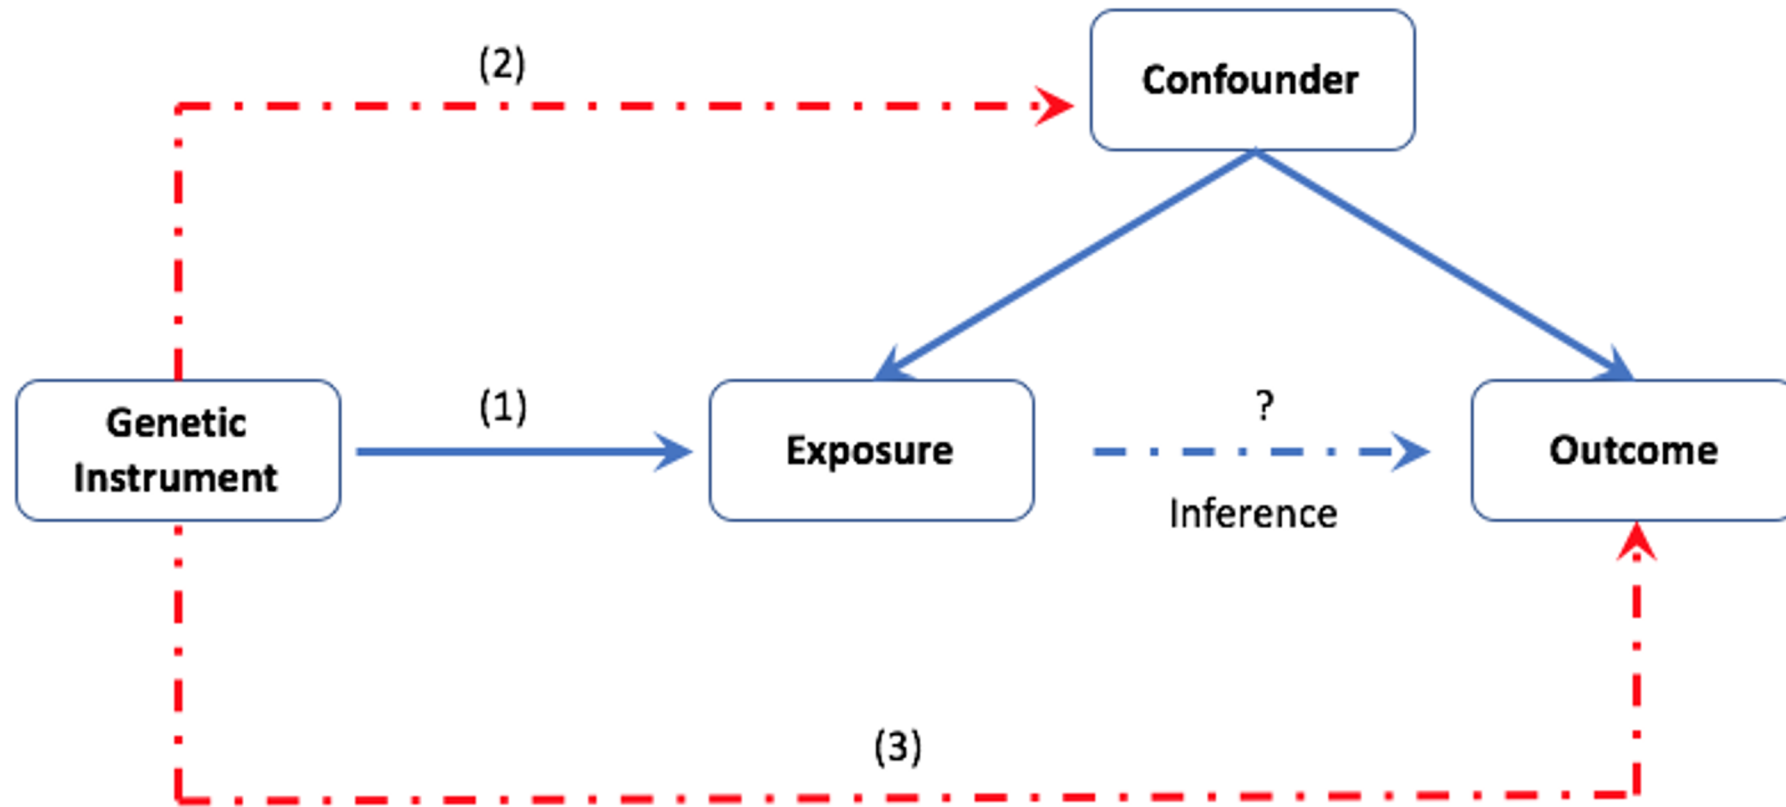

**Figure 1S.** Assumptions of Mendelian randomization: (1) the genetic instrument is associated with the exposure. (2) the genetic instrument should not associate with a confounder. (3) the genetic instrument should affect the outcome only via the exposure.

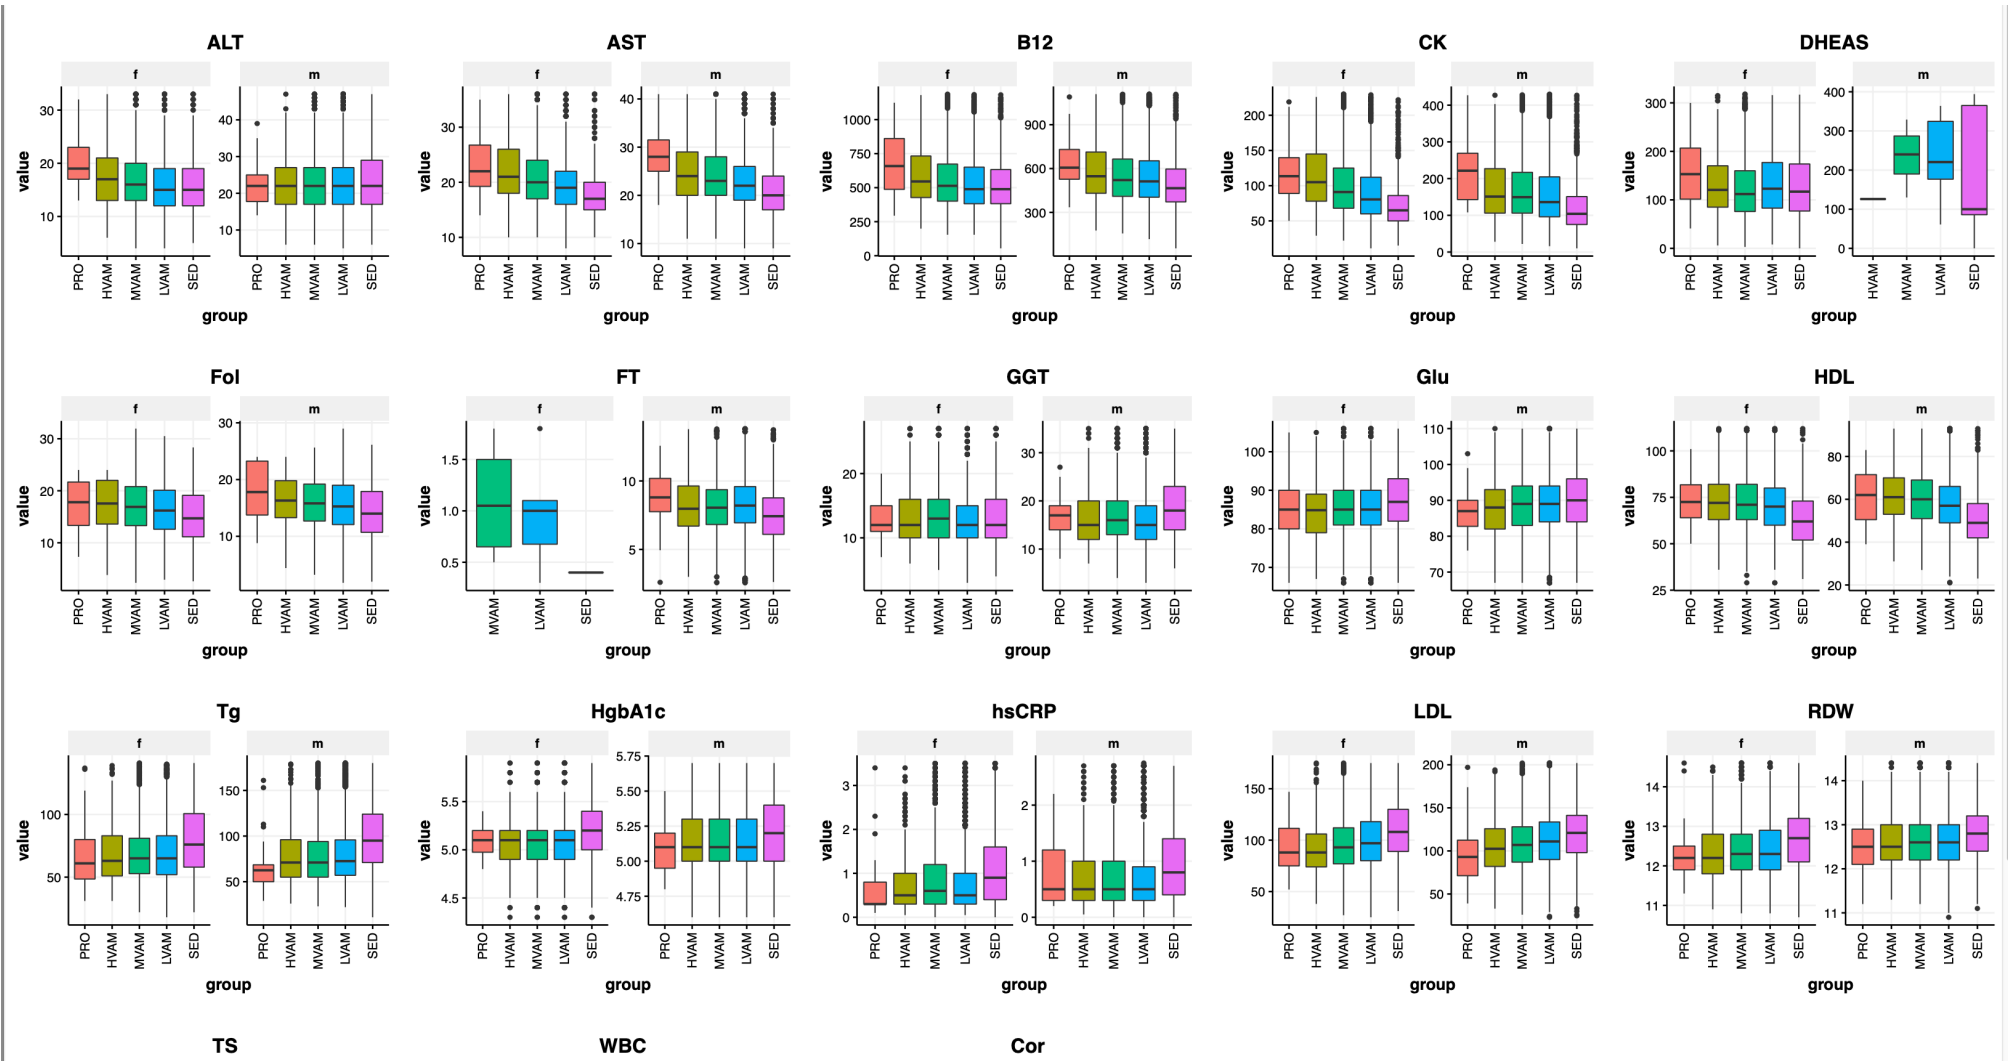

**Figure 2S.** Blood biomarker levels with respect to self-reported running volume and professional athletes in males (m) and females (f).

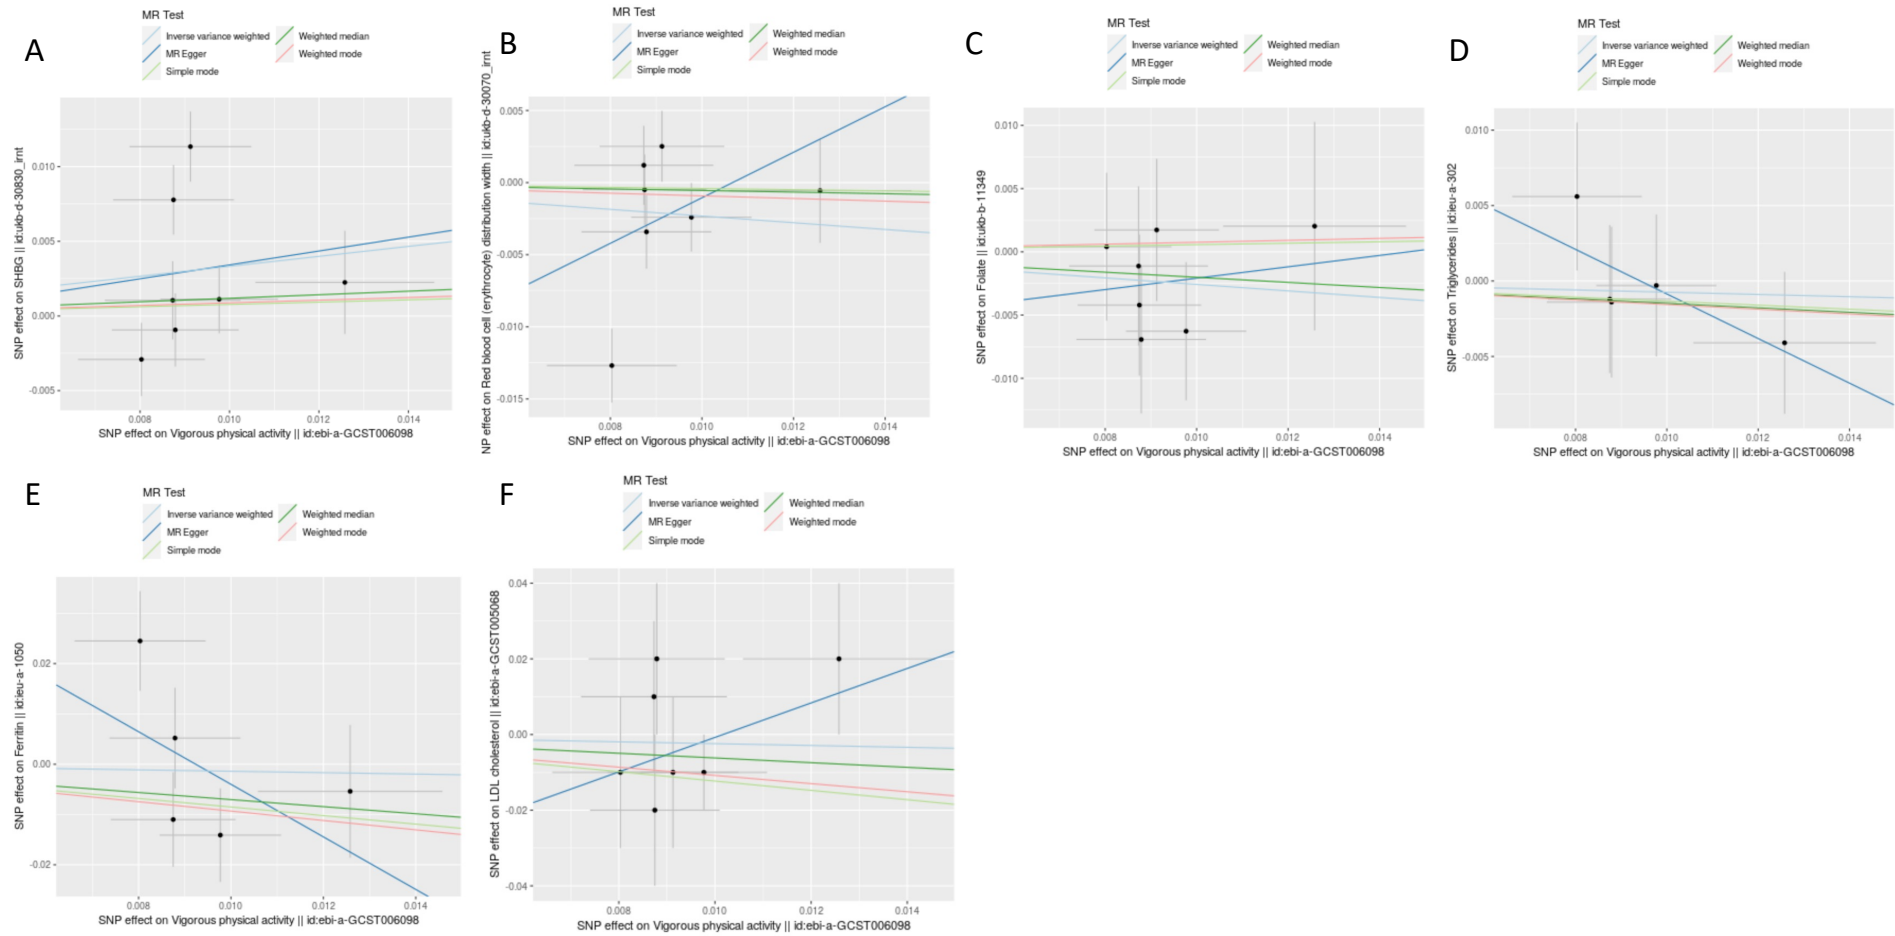

**Figure 3S.** 2S-MR scatter plot showing effects of vigorous physical activity as the exposure on (A) SHBG (B) Red blood cell count (C) Folate (D) Triglycerides (E) Ferritin (F) LDL as outcomes (see Table 5S for statistical significance).

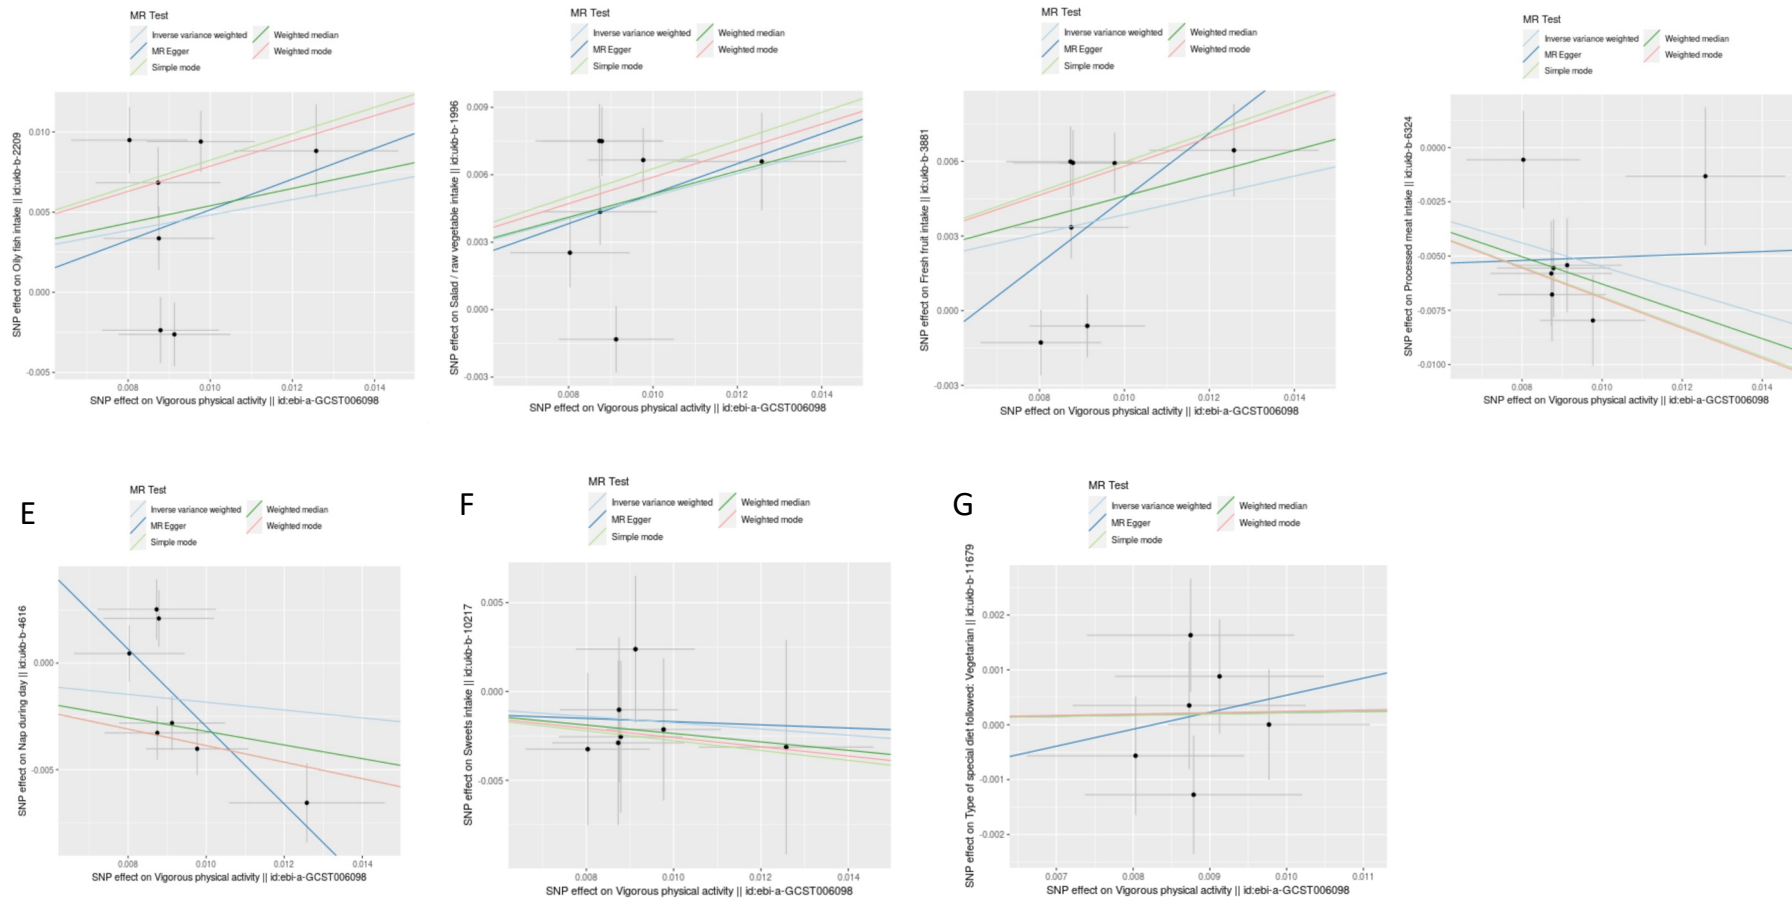

**Figure 4S.** 2S-MR scatter plot showing effects of vigorous physical activity as the exposure on (A) oily fish consumption (B) salad intake (C) fresh fruit intake (D) processed meat intake (E) daytime napping (F) sweets intake (G) vegetarian diet (see Table 6S for statistical significance).



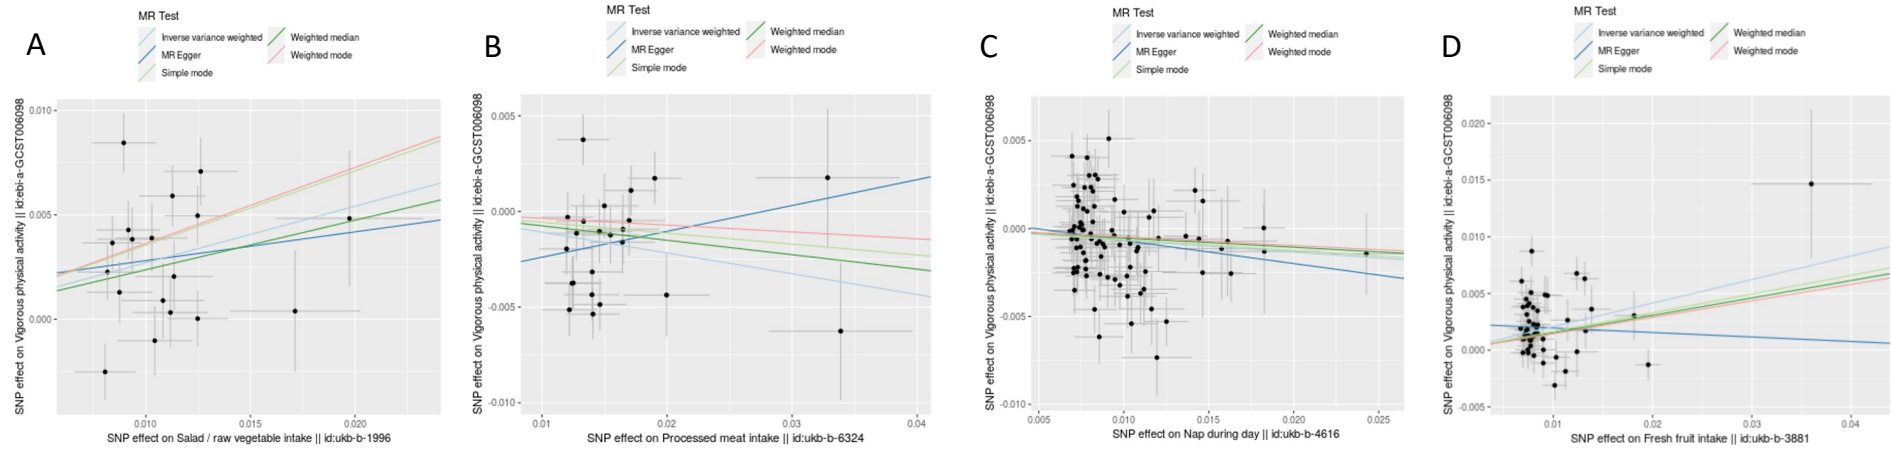

**Figure 5S.** 2S-MR scatter plot showing effects of dietary behaviors as the exposures on vigorous physical activity: (A) salad intake (B) processed meat intake (C) daytime napping (D) fresh fruit intake (see Table 7S for statistical significance).
